# Supplementary material
Source: PubMed Central journal article supplement (PMC6349141)
Supplement: NIHMS79338-supplement-1.pdf [file NIHMS79338-supplement-1.pdf]

## Supplementary Information

### Early neurogenomic response associated with variation in guppy female mate preferences

Natasha I Bloch<sup>\*</sup>, Alberto Corral-López, Severine D. Buechel, Alexander Kotrschal, Niclas Kolm<sup>§</sup> & Judith E. Mank<sup>§</sup>

<sup>§</sup>co-senior authors

\*correspondence to: [n.bloch@ucl.ac.uk](mailto:n.bloch@ucl.ac.uk)

#### This PDF file includes:

Materials and Methods  
Figs. S1 to S8  
Tables S1 to S11  
Captions for databases S1 to S2  
Supplementary references

#### Other Supplementary Materials for this manuscript includes the following:

Databases S1 to S2 as zipped archives:

1. Databases S1: Optic tectum normalized count data for differentially expressed genes
2. Databases S2: Telencephalon normalized count data for differentially expressed genes

**Figure S1: Methodological overview of differentially expressed gene identification.** The same procedure was carried out in Preference lines and Non-preference lines in parallel. Of all significant DE genes for each pairwise comparison, we retained only those with concordant changes in expression in all replicate samples (i.e. either increase in expression between treatment 1 and treatment 2 in ALL samples as illustrated in the graph inset, or decrease in expression between treatments in ALL samples). Once we determined the final set of DE genes for each pairwise treatment comparison, we defined Preference DE genes (or Non-preference DE genes in Non-preference lines), and Social DE genes as described in the lower Venn diagrams.

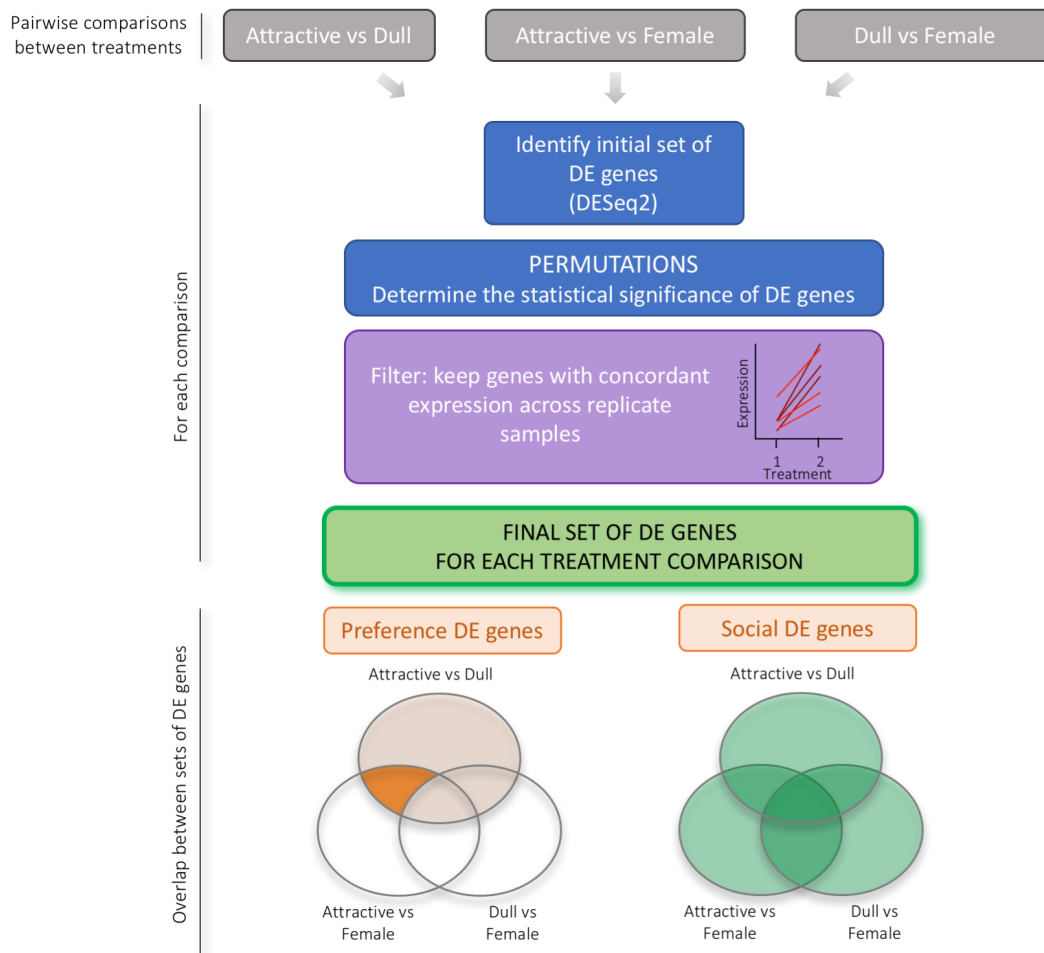

**Figure S2: Heatmap of normalized expression correlations between samples.** Upper half of heatmap corresponds to optic tectum (n= 20396 expressed transcripts) and lower half to telencephalon (n=19571 expressed transcripts). Dendrograms illustrate sample hierarchical clustering based on sample expression distance. Outliers removed from analyses are indicated with (\*).

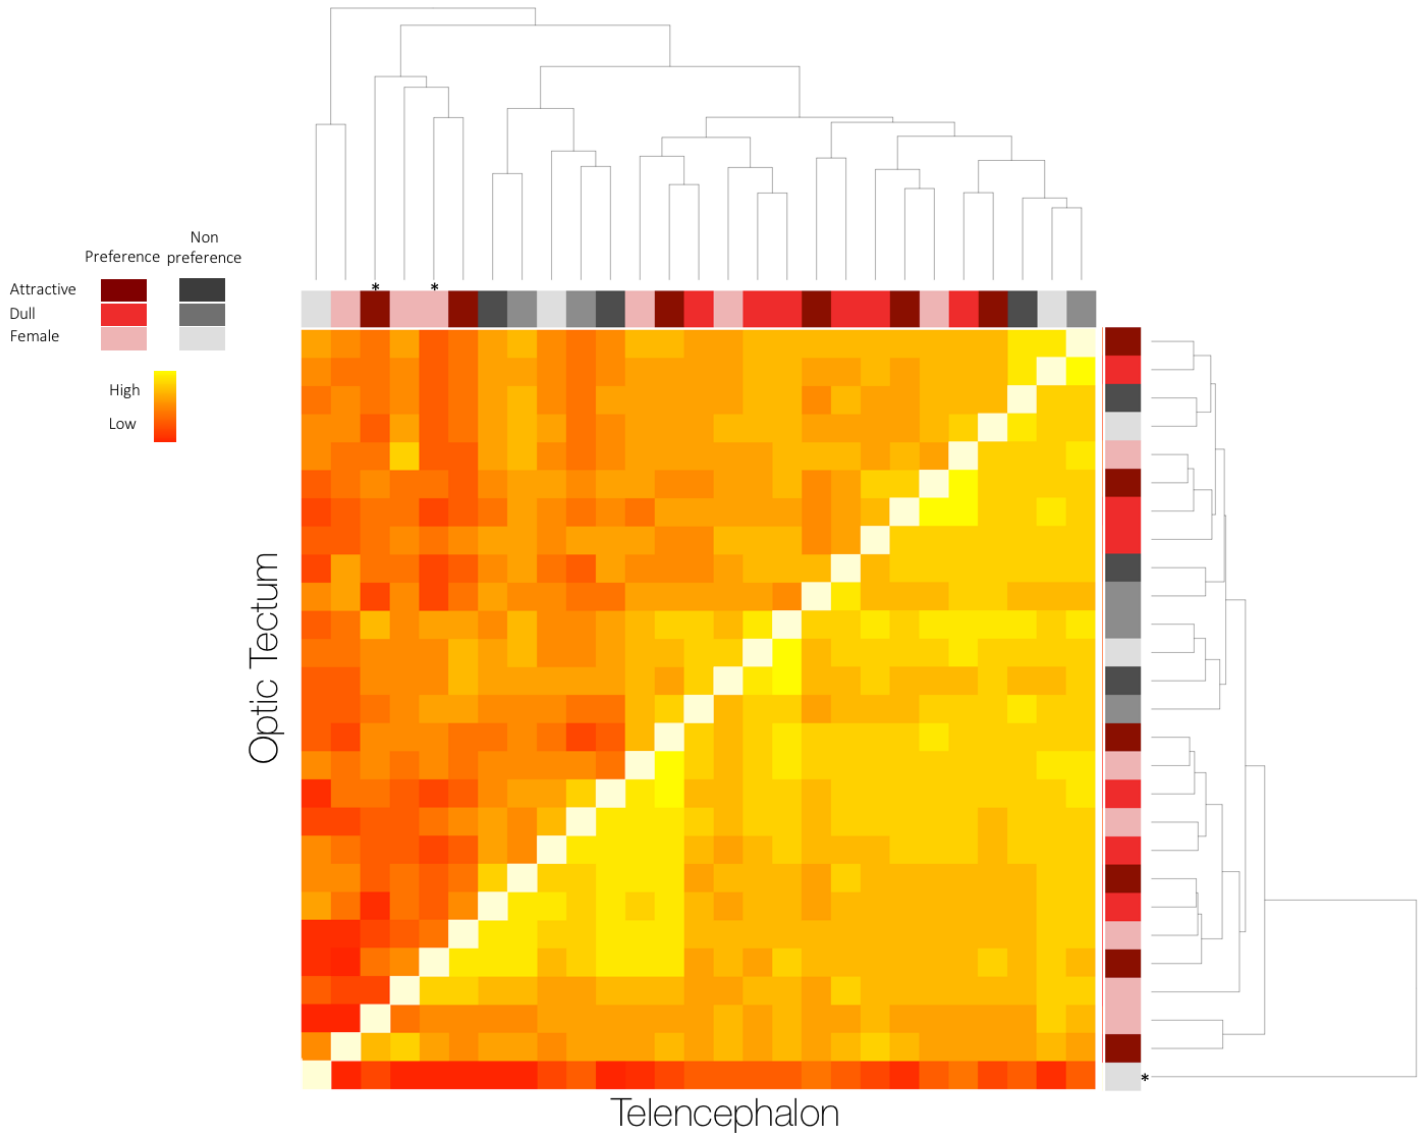

**Figure S3: Hierarchical gene-expression clustering of Non-preference DE genes.**

Clustering of samples for Non-preference DE genes, differentially expressed between attractive and dull male treatments in Non-preference females. We found 61 Non-preference DE genes in the optic tectum and 38 Non-preference DE genes in the telencephalon. Colors below dendrogram correspond to sample treatment and line as indicated in the legend. Values on top of nodes correspond to bootstrap Approximately Unbiased p-values<sup>1</sup>, computed by multiscale bootstrap resampling (all bootstrap values >68%, some not shown for clarity).

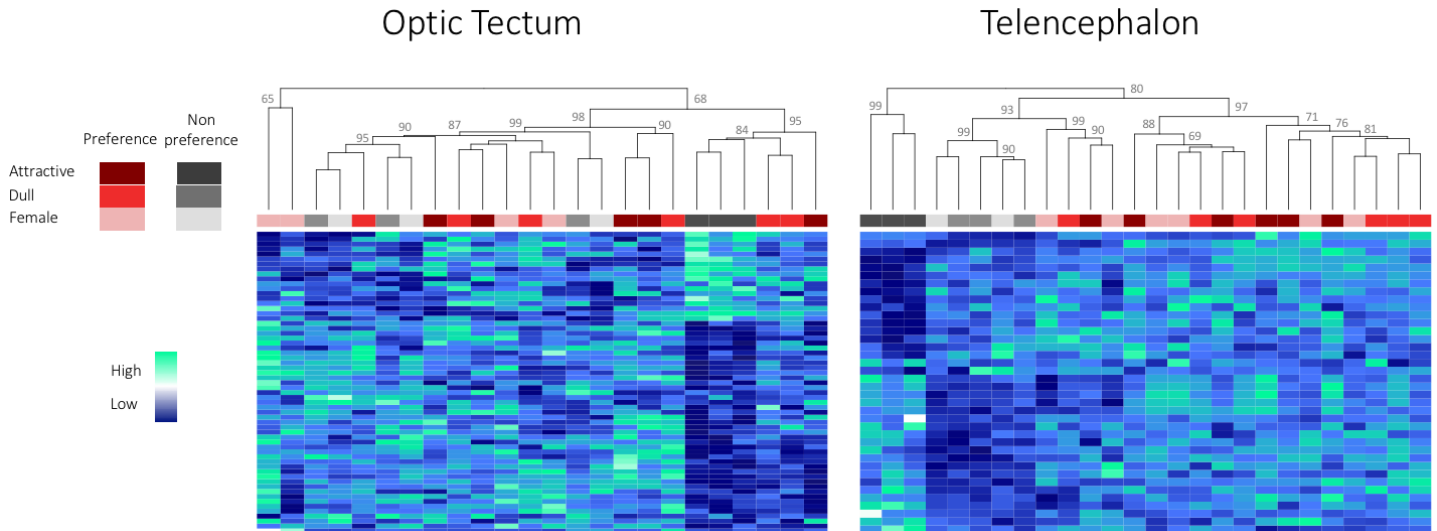

**Figure S4: Co-expression networks.** Overview of optic tectum (A) and telencephalon (B) co-expression networks. Genes highlighted in networks correspond to Preference DE genes in red, Non-preference DE genes in grey, known preference/social behavior genes in green, synaptic plasticity genes & immediate early genes in black/black edge.

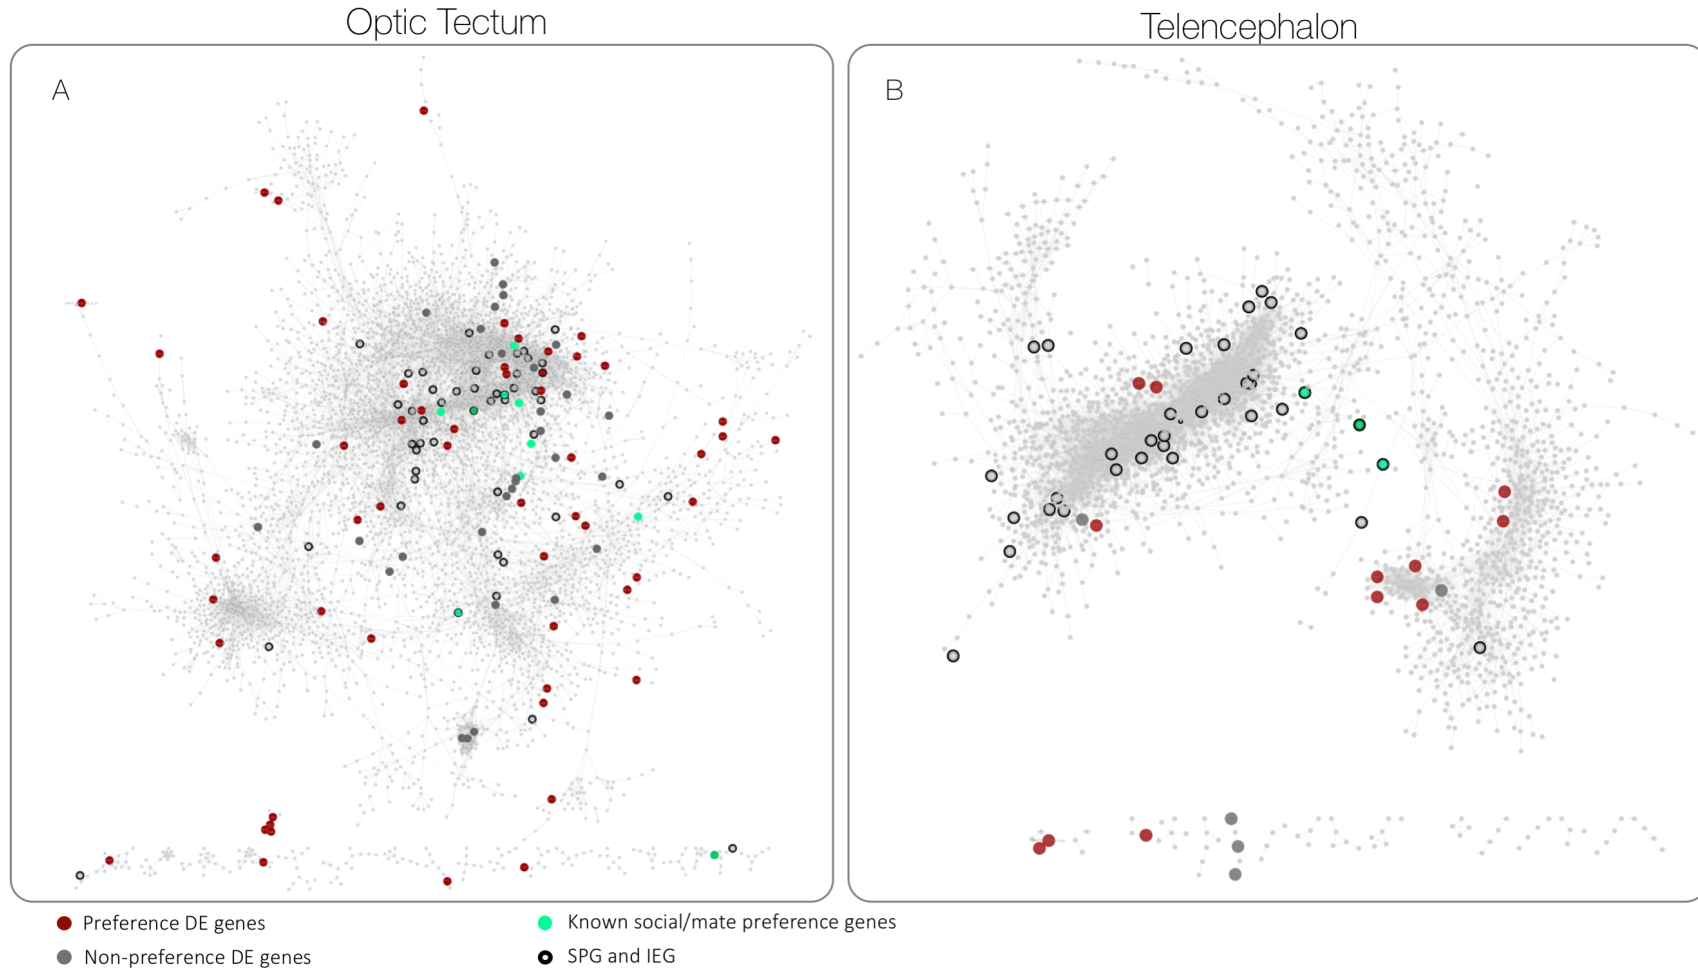

**Figure S5: Co-expression gene module identification dendrograms.** Gene dendrograms showing the co-expression modules identified by the WGCNA dynamic tree cut function. Top colors correspond to module color labels before merging and bottom colors after merging modules whose expression profiles are very similar. Co-expression similarity between modules was estimated by calculating module eigengene correlations.

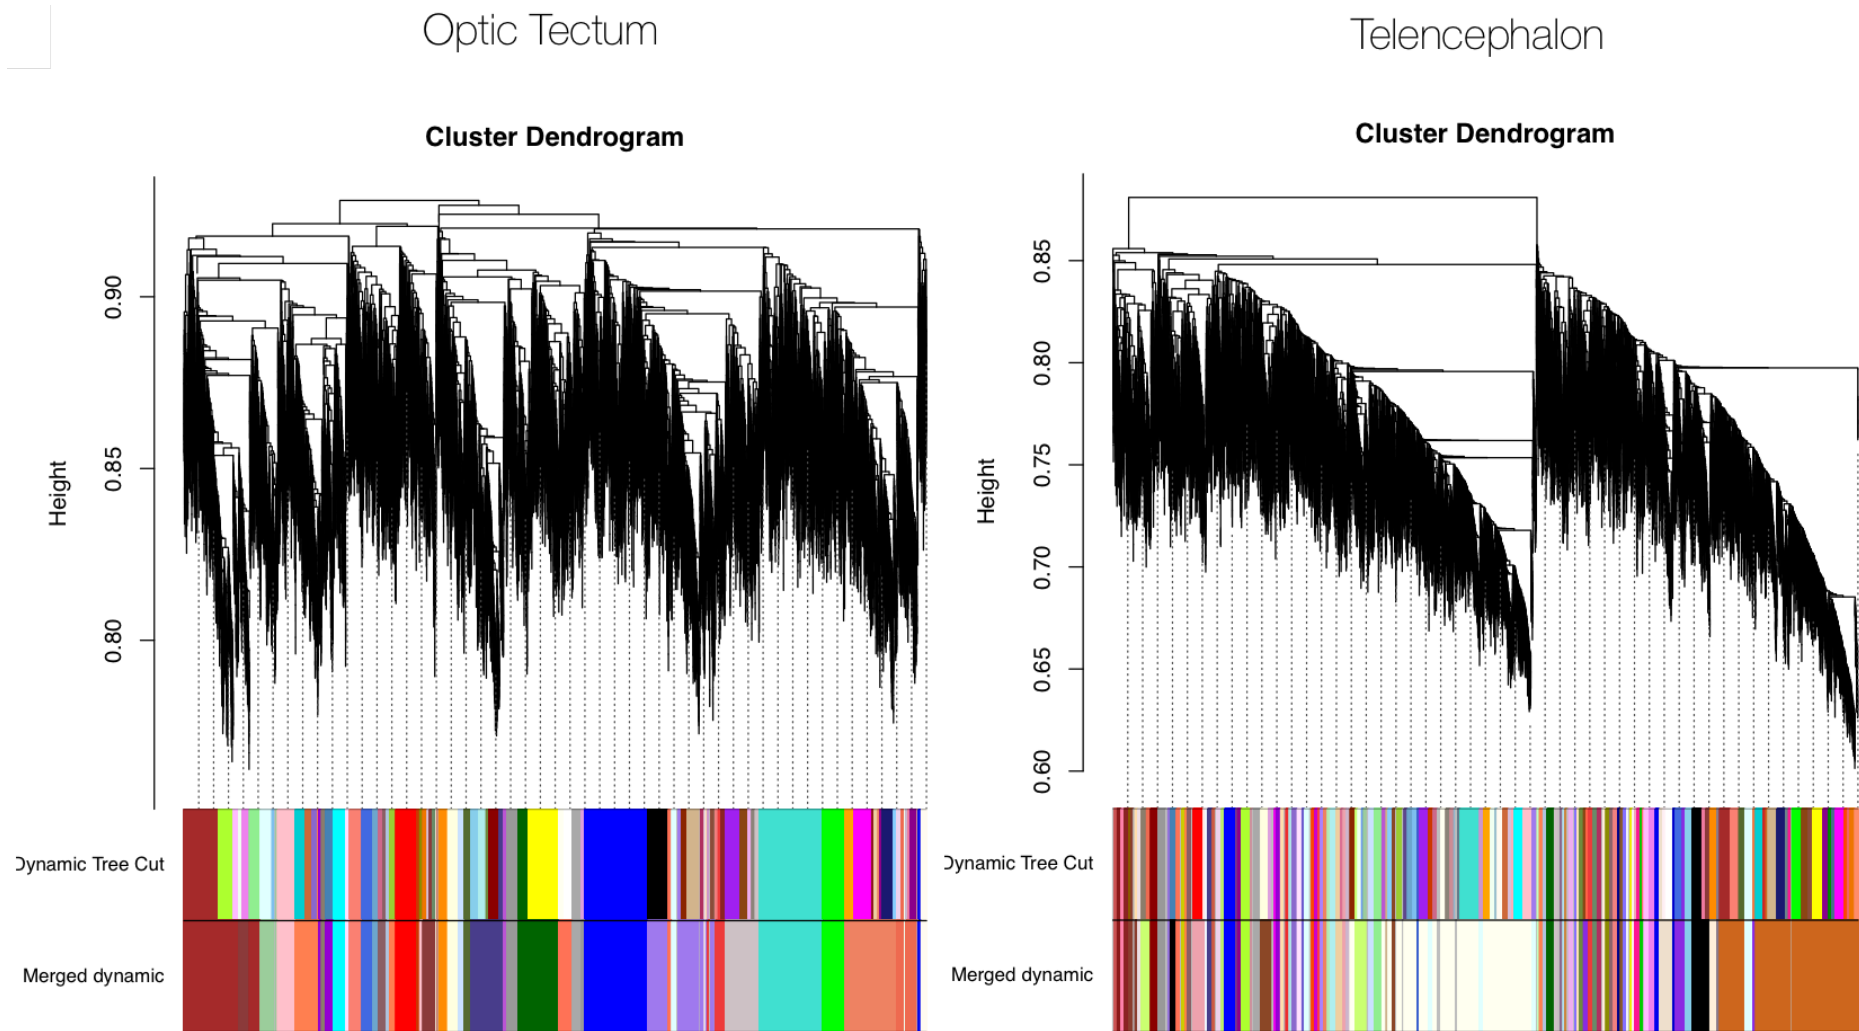

**Figure S6: Social DE genes expression change between attractive and dull treatments in Preference lines relative to Non-preference lines.** Scatterplots showing two different expression patterns of Social DE genes: Scatterplots of attractive:dull  $\log_2$  fold-change in Preference lines (x-axis) against Non-preference lines (y-axis) for Social DE genes in the optic tectum (left) and telencephalon (right). Darker blue points correspond to higher  $\log_2$  fold-change values. In the optic tectum, the outlier gene GOPC was omitted from the graph to better visualize differences across genes. For this gene,  $\log_2$  fold-change in Preference lines is -4.61 and  $\log_2$  fold-change in Non-preference lines is 3.45. Social DE genes could either play similar functions modulating social interactions in both Preference and Non-Preference lines, in which case we would expect them to change in the same direction between the attractive and dull male treatments in both line types. We found 174 optic tectum and 73 telencephalon genes fit this pattern (Fig. S6, quadrants I and III). In contrast, we would expect Social DE genes associated with the loss of female preference phenotype in Non-preference lines would show the opposite pattern. Consistent with this expectation, we identified 213 optic tectum and 88 telencephalon genes that changed in opposite directions between the attractive and dull male treatments in both Preference and Non-Preference lines (Fig. S6, quadrants II and IV).

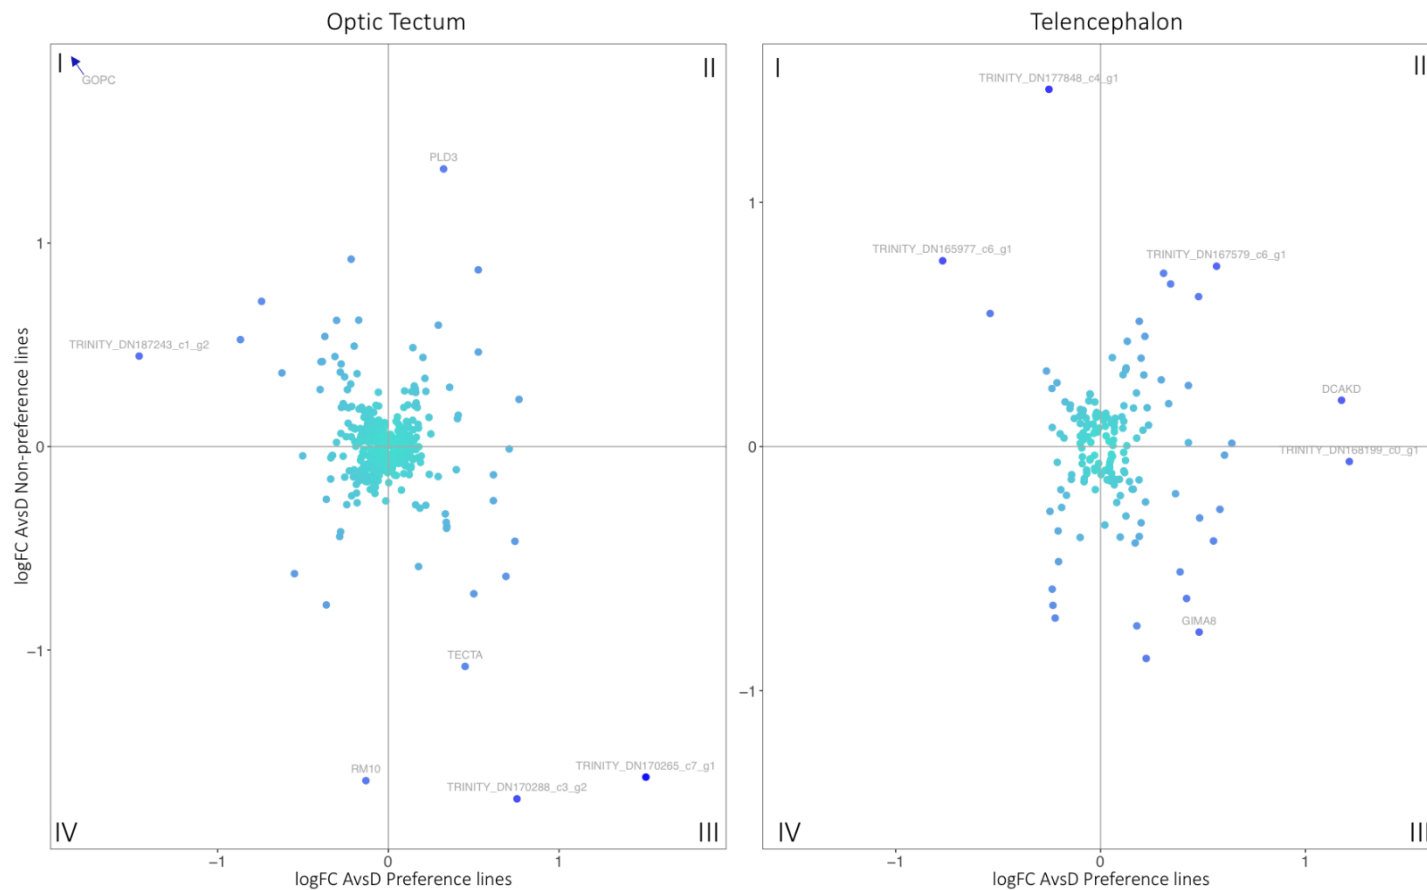

**Figure S7: Gene expression for Transcription factors among Social DE genes known to have TF motifs among Preference DE genes.** Plots showing expression differences by treatment and line for transcription factors in Social DE genes found to have regulatory motifs among Preference DE genes for optic tectum (A) and telencephalon (B). Points indicate mean for treatment group and whiskers extend to minimum and maximum values. Significant pairwise treatment comparisons (based on GLM permutations within Preference lines and Non-preference lines) denoted with (\*).

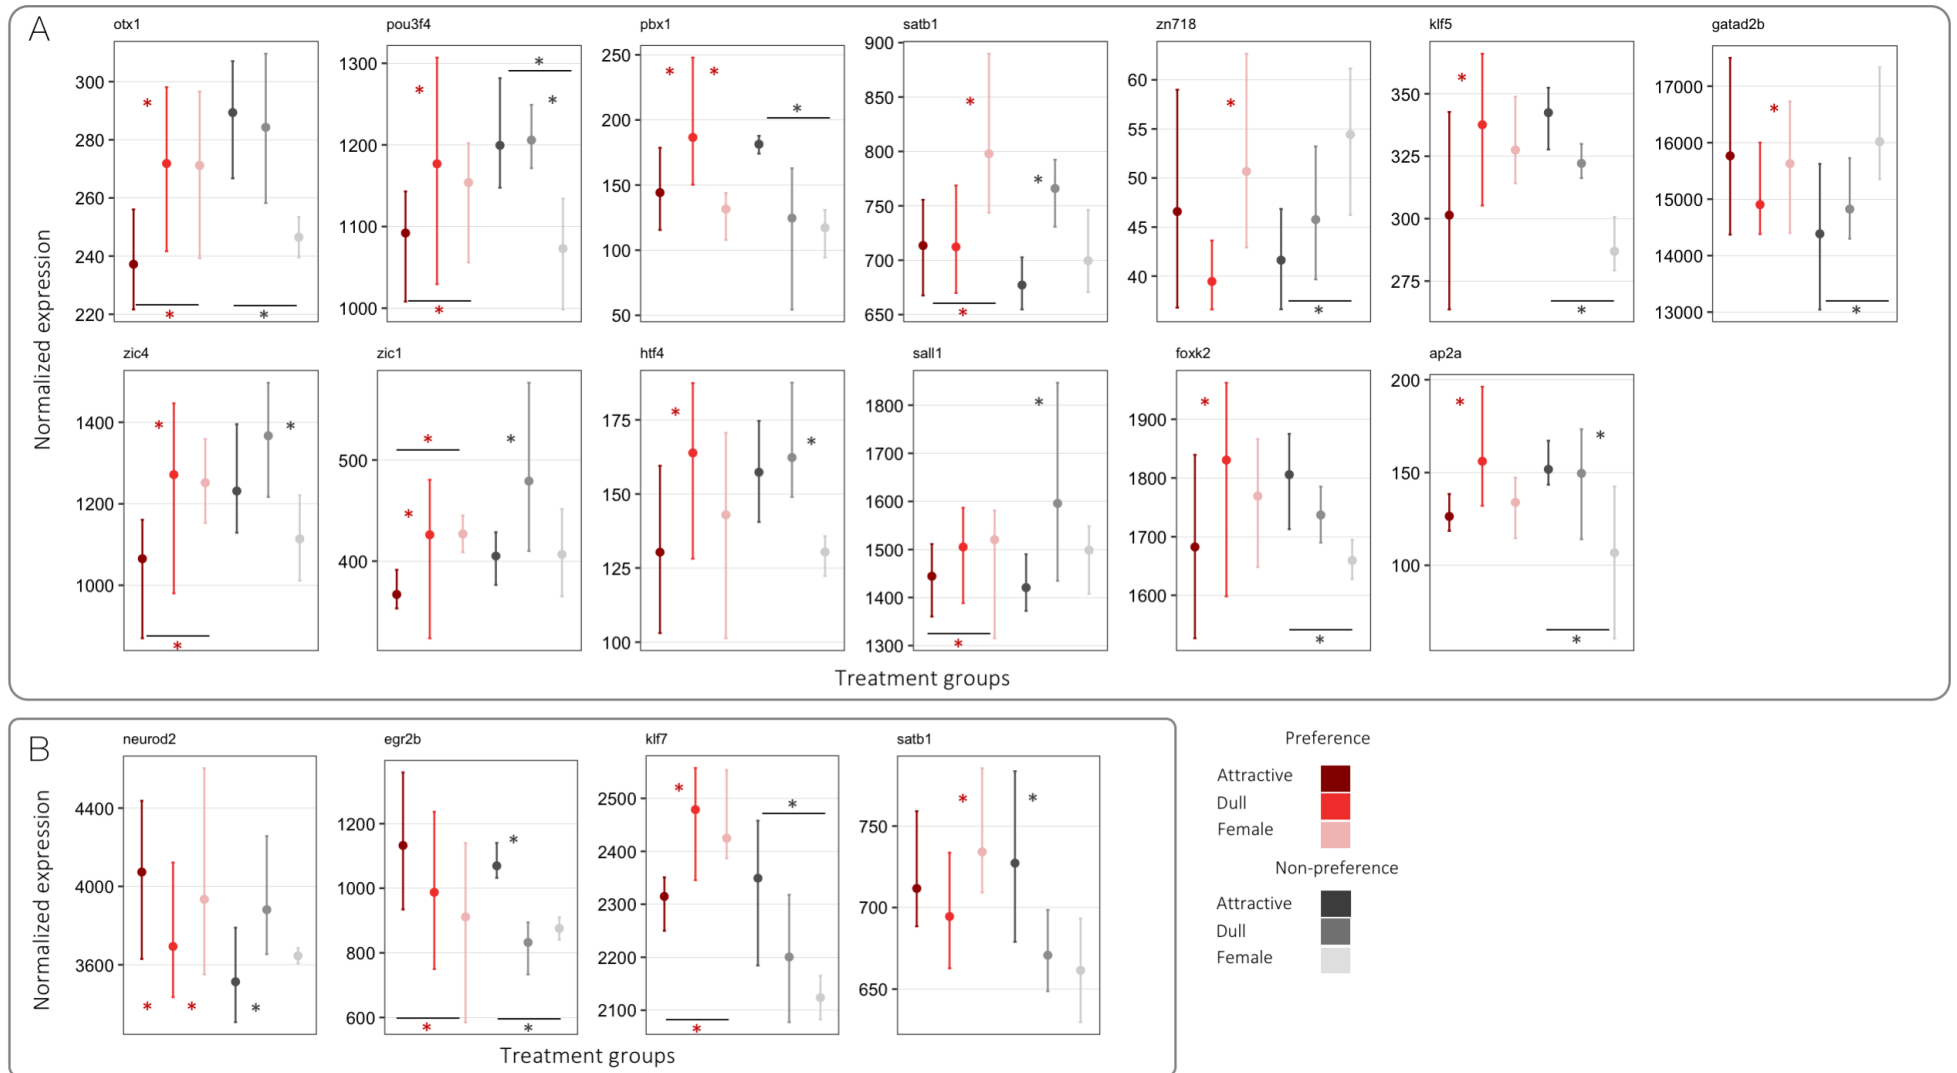



**Figure S8: Transcription factors motifs enriched among Preference DE genes.** Transcription factor motifs associated with Preference DE genes in the optic tectum (A) and the telencephalon (B). TRANSFAC transcription factor binding sites collection as implemented in g:Profiler was used to determine TF motifs associated with each gene (FDR multiple testing correction and a p-value<0.05). Only transcription factors relevant to social behavior, synaptic plasticity or belonging to the same protein families as genes identified in social behavior studies were included. Color of grid is proportional to the number of genes within each module with the corresponding transcription factor motif.

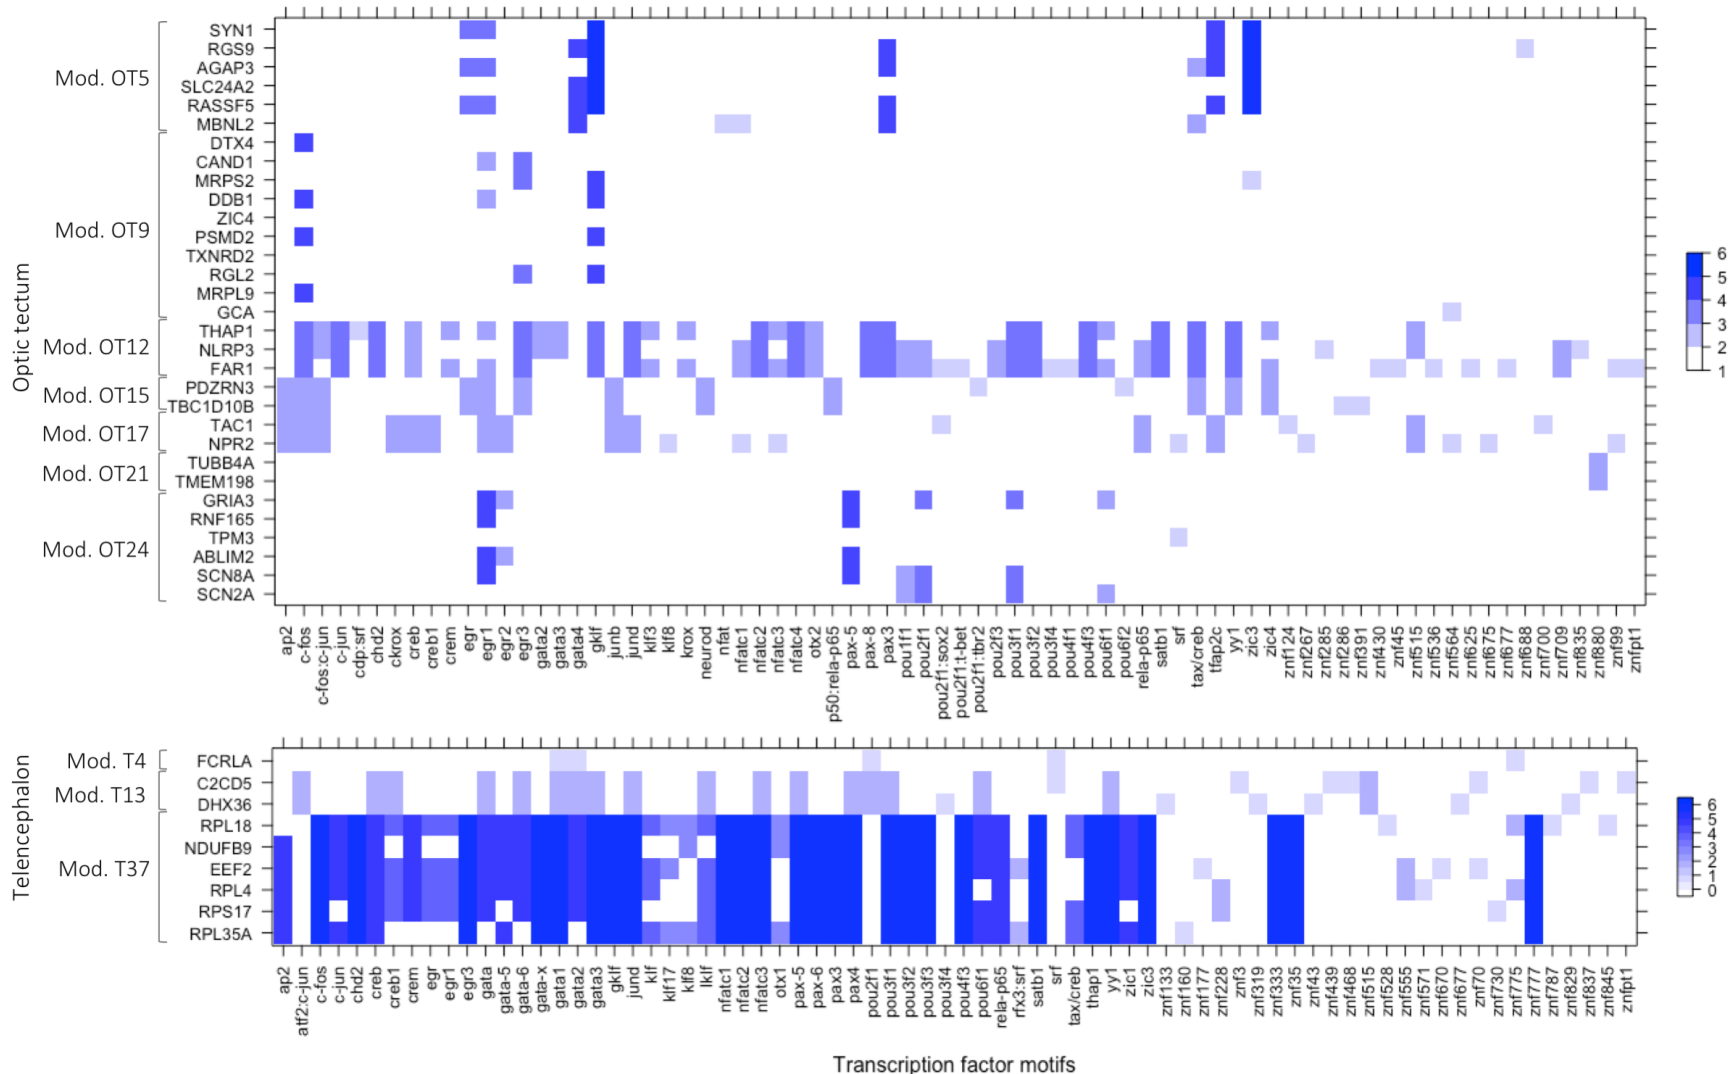

**Table S1:** Identity of in-network Preference DE genes.

| OPTIC TECTUM                  |        |                                                                                                               |                                                                                                                                                                                                                                                                            |
|-------------------------------|--------|---------------------------------------------------------------------------------------------------------------|----------------------------------------------------------------------------------------------------------------------------------------------------------------------------------------------------------------------------------------------------------------------------|
| Gene name                     | Module | Gene description                                                                                              | Relevant pathways - functions - phenotypes <sup>δ</sup>                                                                                                                                                                                                                    |
| <b>Preference DE genes</b>    |        |                                                                                                               |                                                                                                                                                                                                                                                                            |
| <i>trinity_dn187470_c3_g1</i> | OT3    | N/A                                                                                                           | N/A                                                                                                                                                                                                                                                                        |
| <i>agap3</i>                  | OT5    | ArfGAP with GTPase domain, ankyrin repeat and PH domain 3 [Source:ZFIN;Acc:ZDB-GENE-110927-1]                 | response to stimulus - signal transduction                                                                                                                                                                                                                                 |
| <i>mbnl2</i>                  | OT5    | Muscleblind-like protein 2                                                                                    | regulation of gene expression                                                                                                                                                                                                                                              |
| <i>rassf5</i>                 | OT5    | Ras association domain family member 5 [Source:HGNC Symbol;Acc:HGNC:17609]                                    | response to stimulus- signaling - signal transduction<br>ras signaling pathway                                                                                                                                                                                             |
| <i>rgs9</i>                   | OT5    | regulator of G protein signaling 9 [Source:HGNC Symbol;Acc:HGNC:10004]                                        | response to stimulus - response to estrogen- visual perception- regulation of response to stimulus- G-protein coupled receptor signaling pathway- phototransduction pathway                                                                                                |
| <i>slc24a2</i>                | OT5    | solute carrier family 24 (sodium/potassium/calcium exchanger), member 2 [Source:ZFIN;Acc:ZDB-GENE-060825-277] | synaptic signaling - response to stimulus - behavior - cognition - learning and memory - visual perception - calcium ion transport- regulation of synaptic plasticity- long-term synaptic potentiation - ion channel activity                                              |
| <i>syn1</i>                   | OT5    | synapsin I [Source:ZFIN;Acc:ZDB-GENE-081105-93]                                                               | synaptic signaling - neurotransmitter release - vesicle-mediated transport in synapse- Specific learning disability - aggressive behavior - autistic behavior- serotonin and dopamine neurotransmitter release cycle                                                       |
| <i>ctc1</i>                   | OT6    | CTS telomere maintenance complex component 1 [Source:ZFIN;Acc:ZDB-GENE-061103-271]                            | response to stimulus - abnormality of vision                                                                                                                                                                                                                               |
| <i>zacrp4</i>                 | OT9    | C1q and TNF related 4                                                                                         | N/A                                                                                                                                                                                                                                                                        |
| <i>cand1</i>                  | OT9    | cullin-associated and neddylation-dissociated 1 [Source:ZFIN;Acc:ZDB-GENE-040426-2872]                        | response to stimulus                                                                                                                                                                                                                                                       |
| <i>ddb1</i>                   | OT9    | damage specific DNA binding protein 1 [Source:HGNC Symbol;Acc:HGNC:2717]                                      | response to stimulus - detection of stimulus - signal transduction                                                                                                                                                                                                         |
| <i>dtx4</i>                   | OT9    | deltex 4, E3 ubiquitin ligase [Source:ZFIN;Acc:ZDB-GENE-070410-129]                                           | signal transduction - Notch signaling pathway                                                                                                                                                                                                                              |
| <i>gca</i>                    | OT9    | Grancalcin                                                                                                    | response to stimulus                                                                                                                                                                                                                                                       |
| <i>mrpl9</i>                  | OT9    | mitochondrial ribosomal protein L9 [Source:ZFIN;Acc:ZDB-GENE-070717-4]                                        | gene expression - translation                                                                                                                                                                                                                                              |
| <i>mrps2</i>                  | OT9    | mitochondrial ribosomal protein S2 [Source:ZFIN;Acc:ZDB-GENE-070112-992]                                      | gene expression - translation                                                                                                                                                                                                                                              |
| <i>psmd2</i>                  | OT9    | proteasome 26S subunit, non-ATPase 2 [Source:HGNC Symbol;Acc:HGNC:9559]                                       | signal transduction - wnt signaling pathway- MAPK cascade - TCF dependent signaling in response to Wnt - Signaling to RAS - Gastrin-CREB signaling pathway via PKC and MAPK                                                                                                |
| <i>rgl2</i>                   | OT9    | ral guanine nucleotide dissociation stimulator-like 2 [Source:ZFIN;Acc:ZDB-GENE-010131-1]                     | signal transduction - response to stimulus - Ras protein signal transduction - Rho GTPase binding - Ras signaling pathway                                                                                                                                                  |
| <i>txnrd2</i>                 | OT9    | Thioredoxin Reductase 2                                                                                       | response to stimulus                                                                                                                                                                                                                                                       |
| <i>zic4</i>                   | OT9    | zic family member 4 [Source:ZFIN;Acc:ZDB-GENE-040622-4]                                                       | cation binding - brain development                                                                                                                                                                                                                                         |
| <i>far1</i>                   | OT12   | Fatty acyl-CoA reductase 1                                                                                    | primary metabolic process- abnormality of the nervous system                                                                                                                                                                                                               |
| <i>nlrp3</i>                  | OT12   | NLR Family Pyrin Domain Containing 3                                                                          | detection of biotic stimulus - signal transduction - Behavioral abnormality                                                                                                                                                                                                |
| <i>thap1</i>                  | OT12   | THAP domain containing, apoptosis associated protein 1 [Source:ZFIN;Acc:ZDB-GENE-060519-9]                    | abnormality of the nervous system                                                                                                                                                                                                                                          |
| <i>hk1</i>                    | OT14   | Hexokinase 1                                                                                                  | NADH metabolic process - abnormality of vision                                                                                                                                                                                                                             |
| <i>pdzrn3</i>                 | OT15   | (PDZ Domain Containing Ring Finger 3                                                                          | synapse organization                                                                                                                                                                                                                                                       |
| <i>tbc1d10b</i>               | OT15   | TBC1 Domain Family Member 10B                                                                                 | Ras GTPase binding - localization                                                                                                                                                                                                                                          |
| <i>npr2</i>                   | OT17   | Natriuretic Peptide Receptor 2                                                                                | sexual reproduction - signaling - signal transduction - female gamete generation - regulation of oogenesis - signal transducer activity - oxytocin signaling pathway                                                                                                       |
| <i>tac1</i>                   | OT17   | tachykinin 1 [Source:ZFIN;Acc:ZDB-GENE-060503-904]                                                            | Reproduction - cognition - sensory perception - synaptic transmission, GABAergic- behavior - learning and memory - associative learning - long-term memory - detection of stimulus - glucocorticoid and corticosterone secretion - neuropeptide signaling pathway - sexual |

|                               |      |                                                                                       |                                                                                                                                                                                                                                                                                                                                                                                                                                                                                       |
|-------------------------------|------|---------------------------------------------------------------------------------------|---------------------------------------------------------------------------------------------------------------------------------------------------------------------------------------------------------------------------------------------------------------------------------------------------------------------------------------------------------------------------------------------------------------------------------------------------------------------------------------|
| <i>trinity_dn186071_c6_g2</i> | OT17 | N/A                                                                                   | reproduction - MATING - copulation - Gastrin-CREB signaling pathway via PKC and MAPK - Signaling by GPCR                                                                                                                                                                                                                                                                                                                                                                              |
| <i>otx1b</i>                  | OT18 | orthodenticle homeobox 1b [Source:ZFIN;Acc:ZDB-GENE-980526-400]                       | N/A                                                                                                                                                                                                                                                                                                                                                                                                                                                                                   |
| <i>tubb4a</i>                 | OT21 | Tubulin beta chain                                                                    | gene expression                                                                                                                                                                                                                                                                                                                                                                                                                                                                       |
| <i>mem198</i>                 | OT21 | Transmembrane Protein 198                                                             | cellular localization - GnRHR signaling                                                                                                                                                                                                                                                                                                                                                                                                                                               |
| <i>baz2a</i>                  | OT22 | bromodomain adjacent to zinc finger domain, 2A [Source:ZFIN;Acc:ZDB-GENE-041010-202]  | positive regulation of Wnt signaling pathway - regulation of signal transduction - regulation of response to stimulus - GnRHR signaling                                                                                                                                                                                                                                                                                                                                               |
| <i>loc103458058</i>           | OT22 | uncharacterized LOC103458058 [ Poecilia reticulata (guppy) ]                          | regulation of gene expression - gene silencing -                                                                                                                                                                                                                                                                                                                                                                                                                                      |
| <i>ablim2</i>                 | OT24 | Actin Binding LIM Protein Family Member 2                                             | N/A                                                                                                                                                                                                                                                                                                                                                                                                                                                                                   |
| <i>gria3</i>                  | OT24 | glutamate receptor, ionotropic, AMPA3 (alpha 3) [Source:MGI Symbol;Acc:MGI:95810]     | gene expression                                                                                                                                                                                                                                                                                                                                                                                                                                                                       |
| <i>loc108166223</i>           | OT24 | uncharacterized LOC108166223 [ Poecilia reticulata (guppy) ]                          | ion transmembrane transport - synaptic signaling- signal transduction - glutamate receptor signaling/ AMPA glutamate receptor activity - pathway - gated channel activity - neurotransmitter receptor activity - Intellectual disability, severe - behavioral abnormalities - Abnormal emotion/affect behavior - autistic behavior - Long-term depression- Glutamatergic synapse- cAMP signaling pathway - Activation of NMDA receptor upon glutamate binding and postsynaptic events |
| <i>rnfl65</i>                 | OT24 | Ring Finger Protein 165                                                               | N/A                                                                                                                                                                                                                                                                                                                                                                                                                                                                                   |
| <i>rtbs</i>                   | OT24 | Putative RNA-directed DNA polymerase from transposon BS                               | response to external stimulus - signal transduction - transmembrane receptor protein serine/threonine kinase signaling pathway - regulation of gene expression - regulation of BMP signaling pathway                                                                                                                                                                                                                                                                                  |
| <i>scn2a</i>                  | OT24 | sodium channel, voltage-gated, type II, alpha [Source:MGI Symbol;Acc:MGI:98248]       | N/A                                                                                                                                                                                                                                                                                                                                                                                                                                                                                   |
| <i>scn8a</i>                  | OT24 | sodium voltage-gated channel alpha subunit 8 [Source:HGNC Symbol;Acc:HGNC:10596]      | ion transmembrane transport - response to stimulus - signal transduction - voltage-gated channel activity - abnormality of vision - abnormality of higher mental function - Cognitive impairment - Memory impairment - Behavioral abnormality                                                                                                                                                                                                                                         |
| <i>tpm3</i>                   | OT24 | tropomyosin 3 [Source:ZFIN;Acc:ZDB-GENE-030826-16]                                    | regulation of transmembrane transport - voltage-gated channel activity - Behavioral abnormality -short attention span - autistic behavior - Cognitive impairment - Memory impairment - Intellectual disability - abnormality of vision                                                                                                                                                                                                                                                |
| <i>col9a3</i>                 | OT26 | Collagen Type IX Alpha 3 Chain                                                        | abnormality of the eye - Pathways in cancer                                                                                                                                                                                                                                                                                                                                                                                                                                           |
| <i>dhrs11</i>                 | OT34 | dehydrogenase/reductase (SDR family) member 11a [Source:ZFIN;Acc:ZDB-GENE-060929-324] | reproduction and reproductive process - abnormality of vision and the eye - ECM-receptor interaction                                                                                                                                                                                                                                                                                                                                                                                  |
| <i>ager</i>                   | OT34 | Advanced glycosylation end product-specific receptor                                  | oxidoreductase activity                                                                                                                                                                                                                                                                                                                                                                                                                                                               |
| <i>ubtf</i>                   | OT34 | Upstream Binding Transcription Factor, RNA Polymerase I                               | gene expression - response to stimulus - signal transduction - MAPK cascade - JNK cascade - p38MAPK cascade - long term synaptic depression - regulation of long term synaptic depression - positive regulation of JUN kinase activity                                                                                                                                                                                                                                                |
| <i>alpl</i>                   | OT36 | alkaline phosphatase, liver/bone/kidney [Source:ZFIN;Acc:ZDB-GENE-040420-1]           | gene expression                                                                                                                                                                                                                                                                                                                                                                                                                                                                       |
| <i>gpatch8</i>                | OT36 | G patch domain containing 8 [Source:ZFIN;Acc:ZDB-GENE-030131-6966]                    | reproduction and reproductive process - response to stimulus - response to steroid hormone and corticosteroid (glucocorticoid) - hydrolase activity - abnormality of the eye                                                                                                                                                                                                                                                                                                          |
| <i>axin2</i>                  | OT40 | axin 2 [Source:HGNC Symbol;Acc:HGNC:904]                                              | RNA binding - protein binding- ion binding                                                                                                                                                                                                                                                                                                                                                                                                                                            |
| <i>cask</i>                   | OT40 | Calcium/Calmodulin Dependent Serine Protein Kinase                                    | regulation of hydrolase activity - signaling - localization - response to stimulus - signal transduction - Wnt signaling pathway - regulation of gene expression - positive regulation of signal transduction - Pathways in cancer                                                                                                                                                                                                                                                    |
| <i>dnaja3</i>                 | OT40 | DnaJ Heat Shock Protein Family (Hsp40) Member A3)                                     | gene expression - response to external stimulus - localization - ion transport - purine nucleoside metabolic process- synaptic signaling - regulation of neurotransmitter levels - presynaptic process involved in chemical synaptic transmission - neurexin family protein binding - abnormality of the eye and optic nerve - abnormality of vision                                                                                                                                  |
|                               |      |                                                                                       | immune system process - gene expression - synapse organization - response to stimulus - signal transduction - ion binding - purine nucleotide binding                                                                                                                                                                                                                                                                                                                                 |

|                |      |                                                                            |                                                                                                                                            |
|----------------|------|----------------------------------------------------------------------------|--------------------------------------------------------------------------------------------------------------------------------------------|
| <i>kirrel2</i> | OT40 | Kin Of IRRE Like                                                           | primary metabolic process                                                                                                                  |
| <i>mrpl38</i>  | OT40 | mitochondrial ribosomal protein L38 [Source:ZFIN;Acc:ZDB-GENE-040426-2373] | primary metabolic process - gene expression - translation                                                                                  |
| <i>otx1</i>    | OT40 | orthodenticle homeobox 1 [Source:MGI Symbol;Acc:MGI:97450]                 | gene expression - sensory organ development - sensory organ morphogenesis - nucleic acid binding transcription factor activity             |
| <i>pbx1</i>    | OT40 | pre-B-cell leukemia homeobox 1b [Source:ZFIN;Acc:ZDB-GENE-070424-11]       | gene expression - steroid metabolic process - neurogenesis - immune system process - sex differentiation - transcription factor activity - |
| <i>msi1</i>    | OT43 | Musashi RNA Binding Protein 1                                              | nervous system development - mRNA surveillance pathway                                                                                     |

## Non-preference DE genes

|                  |      |                                                                                                                    |                                                                                                                                                                                                                                                                                                                                                                                                                                                |
|------------------|------|--------------------------------------------------------------------------------------------------------------------|------------------------------------------------------------------------------------------------------------------------------------------------------------------------------------------------------------------------------------------------------------------------------------------------------------------------------------------------------------------------------------------------------------------------------------------------|
| <i>fam135b</i>   | OT5  | Family With Sequence Similarity 135 Member B                                                                       | hydrolase activity                                                                                                                                                                                                                                                                                                                                                                                                                             |
| <i>adcyap1r1</i> | OT5  | Anaphase Promoting Complex Subunit 11                                                                              | response to stimulus - response to estradiol - reproduction - primary metabolic process - purine nucleotide metabolic process - cAMP biosynthetic process - calcium ion transport - regulation of hydrolase activity - reproductive process - sexual reproduction - regulation of response to stimulus - signal transduction - G-protein coupled receptor signaling pathway - cAMP signaling pathway - Neuroactive ligand-receptor interaction |
| <i>slco3a1</i>   | OT5  | Solute Carrier Organic Anion Transporter Family Member 3A1                                                         | ion transport - prostaglandin transport - transporter activity                                                                                                                                                                                                                                                                                                                                                                                 |
| <i>sv2a</i>      | OT5  | synaptic vesicle glycoprotein 2A [Source:HGNC Symbol;Acc:HGNC:20566]                                               | localization - ion transport - neurotransmitter transport - ECM-receptor interaction                                                                                                                                                                                                                                                                                                                                                           |
| <i>tmem151b</i>  | OT5  | (Transmembrane Protein 151B)                                                                                       | N/A                                                                                                                                                                                                                                                                                                                                                                                                                                            |
| <i>spock3</i>    | OT5  | SPARC/Osteonectin, Cwcv And Kazal Like Domains Proteoglycan 3)                                                     | primary metabolic process - regulation of hydrolase activity - localization - response to stimulus - signal transduction - ion binding                                                                                                                                                                                                                                                                                                         |
| <i>wbp1</i>      | OT5  | WW domain binding protein 1 [Source:ZFIN;Acc:ZDB-GENE-040426-1830]                                                 | protein binding                                                                                                                                                                                                                                                                                                                                                                                                                                |
| <i>slc7a2</i>    | OT8  | solute carrier family 7 (cationic amino acid transporter, y+ system), member 2 [Source:ZFIN;Acc:ZDB-GENE-041212-5] | primary metabolic process - response to external stimulus - localization - ion transport - ion transmembrane transport                                                                                                                                                                                                                                                                                                                         |
| <i>rpl13</i>     | OT9  | Ribosomal Protein L13                                                                                              | localization - SRP-dependent cotranslational protein targeting to membrane - gene expression - translation - Ribosome pathway                                                                                                                                                                                                                                                                                                                  |
| <i>rpl14</i>     | OT9  | Ribosomal Protein L14                                                                                              | protein localization - gene expression - SRP-dependent cotranslational protein targeting to membrane - Ribosome pathway                                                                                                                                                                                                                                                                                                                        |
| <i>rs12</i>      | OT9  | ribosomal protein S12                                                                                              | Ribosome pathway                                                                                                                                                                                                                                                                                                                                                                                                                               |
| <i>prkg1</i>     | OT14 | Protein Kinase, CGMP-Dependent, Type I                                                                             | regulation of hydrolase activity - response to external stimulus - neurogenesis - signal transduction - cGMP-mediated signaling - ion channel regulator activity - abnormality of the eye - Long-term depression                                                                                                                                                                                                                               |
| <i>dnajc5</i>    | OT16 | DnaJ Heat Shock Protein Family (Hsp40) Member C5                                                                   | localization - neurotransmitter transport - synaptic vesicle localization - synaptic signaling - signal release from synapse                                                                                                                                                                                                                                                                                                                   |
| <i>flot1</i>     | OT16 | flotillin 1b [Source:ZFIN;Acc:ZDB-GENE-020430-2]                                                                   | synaptic signaling - neurogenesis - response to stimulus - localization - signal transduction - Ras protein signal transduction - Rho protein signal transduction - glutamate receptor binding                                                                                                                                                                                                                                                 |
| <i>myrf</i>      | OT16 | (Myelin Regulatory Factor                                                                                          | gene expression - nervous system process - neurogenesis - transcription factor activity - hydrolase activity                                                                                                                                                                                                                                                                                                                                   |
| <i>sgk3</i>      | OT16 | serum/glucocorticoid regulated kinase family, member 3 [Source:ZFIN;Acc:ZDB-GENE-070424-62]                        | localization - ion transmembrane transport - response to stimulus - signal transduction - ion channel regulator activity                                                                                                                                                                                                                                                                                                                       |
| <i>stxbp6</i>    | OT16 | Syntaxin Binding Protein 6)                                                                                        | localization - regulation of transport - ion binding - Ras GTPase binding - Rho GTPase binding                                                                                                                                                                                                                                                                                                                                                 |
| <i>gjb1</i>      | OT31 | Gap Junction Protein Beta 1                                                                                        | localization - transmembrane transport - reproductive system development - reproductive process - transmembrane transporter activity - channel activity - Behavioral abnormality - Sensory impairment - abnormality of the eye                                                                                                                                                                                                                 |
| <i>plp1</i>      | OT31 | Myelin proteolipid protein                                                                                         | gene expression - neurogenesis - response to stimulus - synaptic signaling - signal transduction - Sensory neuropathy - abnormality of the nervous system - Cognitive impairment - abnormality of the optic nerve                                                                                                                                                                                                                              |
| <i>rhoab</i>     | OT31 | ras homolog gene family, member Ab [Source:ZFIN;Acc:ZDB-GENE-040322-2]                                             | localization - response to stimulus - signal transduction - Ras protein signal transduction - Rho protein signal transduction - hydrolase activity - Wnt signaling pathway                                                                                                                                                                                                                                                                     |

|                 |      |                                                                                      |                                                                                                                                                                                                                 |
|-----------------|------|--------------------------------------------------------------------------------------|-----------------------------------------------------------------------------------------------------------------------------------------------------------------------------------------------------------------|
| <i>bcas1</i>    | OT32 | breast carcinoma amplified sequence 1                                                | N/A                                                                                                                                                                                                             |
| <i>cd59</i>     | OT32 | CD59 molecule, complement regulatory protein [Source:ZFIN;Acc:ZDB-GENE-030131-7871]  | gene expression - response to external stimulus - primary metabolic process - signal transduction                                                                                                               |
| <i>mbp-like</i> | OT32 | loc103478274 - myelin basic protein-like [ Poecilia reticulata (guppy) ]             | N/A                                                                                                                                                                                                             |
| <i>mag</i>      | OT32 | myelin associated glycoprotein [Source:ZFIN;Acc:ZDB-GENE-041217-24]                  | response to external stimulus - neurogenesis - regulation of neurological system process - ion binding - abnormality of the eye - abnormality of the optic nerve - abnormality of vision - Cognitive impairment |
| <i>paqr6</i>    | OT32 | progesterin and adipoQ receptor family member VI [Source:ZFIN;Acc:ZDB-GENE-090714-1] | response to stimulus - signal transduction - hormone-mediated signaling pathway - signal transducer activity - steroid hormone receptor activity                                                                |
| <i>ppp1r14a</i> | OT32 | Protein Phosphatase 1 Regulatory Inhibitor Subunit 14A                               | response to stimulus                                                                                                                                                                                            |
| <i>slc2a3</i>   | OT34 | Solute Carrier Family 2 Member 3                                                     | localization - transmembrane transport - response to stimulus - transporter activity - Cognitive impairment - Behavioral abnormality                                                                            |
| <i>cxorf57</i>  | OT40 | Chromosome X Open Reading Frame 57                                                   | protein binding                                                                                                                                                                                                 |
| <i>smg8</i>     | OT40 | SMG8 nonsense mediated mRNA decay factor [Source:ZFIN;Acc:ZDB-GENE-091204-279]       | primary metabolic process - regulation of gene expression                                                                                                                                                       |
| <i>aars2</i>    | OT40 | Alanyl-TRNA Synthetase 2, Mitochondrial                                              | primary metabolic process - gene expression - translation - ion binding - Cognitive impairment - Behavioral abnormality - Abnormal nervous system electrophysiology                                             |

## TELENCEPHALON

### Preference DE genes

|                               |     |                                                                              |                                                                                                                                                                                                                                                                                                                                 |
|-------------------------------|-----|------------------------------------------------------------------------------|---------------------------------------------------------------------------------------------------------------------------------------------------------------------------------------------------------------------------------------------------------------------------------------------------------------------------------|
| <i>c2cd5</i>                  | T13 | C2 calcium dependent domain containing 5 [Source:HGNC Symbol;Acc:HGNC:29062] | response to stimulus - localization - transmembrane transport - signal transduction - transmembrane receptor protein tyrosine kinase signaling pathway - ion binding                                                                                                                                                            |
| <i>dhx36</i>                  | T13 | DEAH-box helicase 36 [Source:HGNC Symbol;Acc:HGNC:14410]                     | localization - response to external stimulus - gene expression - regulation of transport - ion binding - hydrolase activity                                                                                                                                                                                                     |
| <i>rtbs</i>                   | T13 | Putative RNA-directed DNA polymerase from transposon BS                      | N/A                                                                                                                                                                                                                                                                                                                             |
| <i>fcrla</i>                  | T4  | Fc receptor like A [Source:HGNC Symbol;Acc:HGNC:18504]                       | cell differentiation - protein binding                                                                                                                                                                                                                                                                                          |
| <i>trinity_dn171917_c2_g2</i> | T4  | N/A                                                                          | N/A                                                                                                                                                                                                                                                                                                                             |
| <i>rps2</i>                   | T46 | Ribosomal Protein S2                                                         | response to stimulus - primary metabolic process - translation - Ribosome pathway                                                                                                                                                                                                                                               |
| <i>rpl35a</i>                 | T37 | Ribosomal Protein L35a                                                       | gene expression - translation - RNA binding - Ribosome pathway                                                                                                                                                                                                                                                                  |
| <i>rpl18</i>                  | T37 | Ribosomal Protein L18                                                        | gene expression - translation - RNA binding - Ribosome pathway                                                                                                                                                                                                                                                                  |
| <i>ef2</i>                    | T37 | Eukaryotic Translation Elongation Factor 2                                   | response to external stimulus - response to estradiol - gene expression - translation - primary metabolic process - hydrolase activity - RNA binding - ion binding - abnormality of the eye - AMPK signaling pathway - oxytocin signaling pathway - abnormality of the nervous system                                           |
| <i>rpl4</i>                   | T37 | 60S ribosomal protein L4-A                                                   | localization - SRP-dependent cotranslational protein targeting to membrane - protein localization - gene expression - translation - Ribosome pathway - RNA binding                                                                                                                                                              |
| <i>ndufb9</i>                 | T37 | NADH:Ubiquinone Oxidoreductase Subunit B9                                    | primary metabolic process - NADH dehydrogenase activity - sensory perception - abnormality of higher mental function - abnormality of the eye - Visual impairment - abnormality of the optic nerve - Morphological abnormality of the central nervous system - Parkinson's disease - Huntington's disease - Alzheimer's disease |
| <i>rps17</i>                  | T37 | Ribosomal Protein S17                                                        | immune system process - localization - primary metabolic process - RNA processing - translation - RNA binding - Ribosome pathway - abnormality of the nervous system                                                                                                                                                            |

### Non-preference DE genes

|               |     |                                                        |                                                                                                                                                                                                            |
|---------------|-----|--------------------------------------------------------|------------------------------------------------------------------------------------------------------------------------------------------------------------------------------------------------------------|
| <i>ttc39b</i> | T13 | Tetratricopeptide Repeat Domain 39B                    | N/A                                                                                                                                                                                                        |
| <i>plk2</i>   | T31 | polo like kinase 2 [Source:HGNC Symbol;Acc:HGNC:19699] | primary metabolic process - behavior - response to stimulus - cognition - learning or memory - neurogenesis - signal transduction - Ras protein signal transduction - ion binding - FoxO signaling pathway |

|                |     |                                                                                          |                                                                                                                                                                                                                                                                                                                                                                                                                                                                    |
|----------------|-----|------------------------------------------------------------------------------------------|--------------------------------------------------------------------------------------------------------------------------------------------------------------------------------------------------------------------------------------------------------------------------------------------------------------------------------------------------------------------------------------------------------------------------------------------------------------------|
| <i>adgrb1</i>  | T29 | adhesion G protein-coupled receptor B1 [Source:HGNC Symbol;Acc:HGNC:943]                 | localization - transport - nervous system development - neurogenesis - response to stimulus - synaptic signaling - synapse organization - signal transduction - ion binding - G-protein coupled receptor activity - signaling receptor activity                                                                                                                                                                                                                    |
| <i>jun</i>     | T20 | Jun proto-oncogene, AP-1 transcription factor subunit [Source:HGNC Symbol;Acc:HGNC:6204] | behavior - response to external stimulus - cognition - learning or memory - localization - sensory organ development - regulation of hydrolase activity - response to cAMP - signal transduction - MAPK cascade - cAMP response element binding - Pathways in cancer - Oxytocin signaling pathway - cAMP signaling pathway - Estrogen signaling pathway - Wnt signaling pathway - GnRH signaling pathway - MAPK signaling pathway - Neurotrophin signaling pathway |
| <i>rtm4rl2</i> | T23 | Reticulon 4 Receptor Like 2                                                              | response to stimulus - neurogenesis - signal transduction - STAT cascade - receptor activity                                                                                                                                                                                                                                                                                                                                                                       |

δCompiled from g:Profiler<sup>2</sup>

**Table S2:** Chromosome enrichment.

|           |               | Preference DE genes |               | Non-preference DE genes |               |
|-----------|---------------|---------------------|---------------|-------------------------|---------------|
|           |               | OPTIC TECTUM        | TELENCEPHALON | OPTIC TECTUM            | TELENCEPHALON |
| Autosomes | LG1           | 13                  | 4             | 1                       | 2             |
|           | LG2           | 9                   | 7             | 5                       | 0             |
|           | LG3           | 4                   | 5             | 2                       | 0             |
|           | LG4           | 7                   | 8             | 1                       | 2             |
|           | LG5           | 9                   | 3             | 3                       | 4             |
|           | LG6           | 10                  | 5             | 2                       | 1             |
|           | LG7           | 8                   | 4             | 2                       | 0             |
|           | LG8           | 11                  | 6             | 3                       | 1             |
|           | LG9           | 6                   | 5             | 1                       | 2             |
|           | LG10          | 6                   | 1             | 1                       | 0             |
|           | LG11          | 8                   | 4             | 3                       | 1             |
|           | LG13          | 4                   | 9 (p=0.03)    | 0                       | 0             |
|           | LG14          | 7                   | 0             | 3                       | 0             |
|           | LG15          | 3                   | 1             | 3                       | 1 (p=0.03)    |
|           | LG16          | 12                  | 11 (p=0.01)   | 5 (p=0.02)              | 1             |
|           | LG17          | 4                   | 7             | 3                       | 1             |
|           | LG18          | 8                   | 0             | 2                       | 1             |
|           | LG19          | 10                  | 6             | 1                       | 1             |
|           | LG20          | 8                   | 4             | 1                       | 0             |
|           | LG21          | 11 (p=0.05)         | 2             | 1                       | 0             |
|           | LG22          | 9                   | 2             | 1                       | 2             |
|           | LG23          | 3                   | 2             | 5                       | 0             |
|           | X chromosomes | LG12                | 10            | 0                       | 1             |

Numbers correspond to number of Preference DE genes in each chromosome. Remaining genes map to unplaced scaffolds. P-values correspond to one-tail fisher's exact test for gene enrichment in each chromosome considering the number of total genes mapped to each linkage group. Non-significant P-values are > 0.05.

**Table S3:** Co-expression network properties.

|                                                | <b>OPTIC TECTUM</b> | <b>TELENCEPHALON</b> |
|------------------------------------------------|---------------------|----------------------|
| Total number of transcripts                    | 20396               | 19571                |
| Transcripts with correlation $> 0.4 $          | 6297                | 3540                 |
| Preference DE genes remaining in network       | 57                  | 12                   |
| Non-preference DE genes remaining in network   | 31                  | 6                    |
| <b>ATTRIBUTES</b>                              |                     |                      |
| Network average degree (se)                    | 6.7 (3.9)           | 10.8 (5.5)           |
| Network average Clustering Coefficient (se)    | 0.2 (0.6)           | 0.3 (0.6)            |
| Network average Neighborhood Connectivity (se) | 10.8 (3.2)          | 19.0 (4.6)           |
| <b>MODULES</b>                                 |                     |                      |
| Number of modules identified before merging    | 92                  | 160                  |
| Number of modules identified before merging    | 43                  | 89                   |



**Table S4:** List of know social behavior/ mate preference genes used in this study. Compiled from<sup>4-7</sup>.

| Social behavior / mate preference gene | Social behavior subcategory |
|----------------------------------------|-----------------------------|
| <i>acsl1</i>                           | General social              |
| <i>acsl1b</i>                          | General social              |
| <i>acsl3</i>                           | General social              |
| <i>acsl3b</i>                          | General social              |
| <i>adra1b</i>                          | Receptivity                 |
| <i>adrb1</i>                           | Receptivity                 |
| <i>cant1 (apyrase)</i>                 | General social              |
| <i>cyp191b (brain aromatase)</i>       | Receptivity                 |
| <i>c14sr</i>                           | General social              |
| <i>celsr1</i>                          | General social              |
| <i>dhps</i>                            | General social              |
| <i>gnrh2</i>                           | General social              |
| <i>neui (isotocin)</i>                 | General social              |
| <i>itgb5</i>                           | General social              |
| <i>kpnb1</i>                           | General social              |
| <i>napb</i>                            | General social              |
| <i>napa</i>                            | General social              |
| <i>nlg2</i>                            | Mate Preference             |
| <i>nlg3 (neuroligin-3)</i>             | Mate Preference             |
| <i>serpin1 (neuroserpin)</i>           | Mate Preference             |
| <i>nicn1</i>                           | General social              |
| <i>grin1b (nmdarb)</i>                 | Mate Preference             |
| <i>grin1 (nmdar)</i>                   | Mate Preference             |
| <i>plat (tpa)</i>                      | Mate Preference             |
| <i>sf3b1</i>                           | General social              |
| <i>sg10</i>                            | Mate Preference             |
| <i>stmn2</i>                           | Mate Preference             |
| <i>stmn2par</i>                        | General social              |
| <i>th</i>                              | Receptivity                 |
| <i>avt (vasotocin)</i>                 | General social              |
| <i>avpi</i>                            | General social              |
| <i>avpr2</i>                           | General social              |
| <i>egr1</i>                            | Mate Preference             |
| <i>egr1a</i>                           | Mate Preference             |
| <i>egr1b</i>                           | Mate Preference             |
| <i>egr3</i>                            | General social              |
| <i>bdnf</i>                            | General social              |
| <i>neuroD</i>                          | General social              |
| <i>npas4</i>                           | General social              |
| <i>wnt3</i>                            | General social              |

**Table S5:** List of know Synaptic Plasticity genes (SPG) and Immediate Early genes (IEG) used in this study. Compiled from<sup>3</sup>.

| IEG           | Late Response Genes | Long Term Potentiation (LTP)          | Long Term Depression | Cell Adhesion | Extracellular Matrix & Proteolytic Processing | CREB Cofactors | Neuronal Receptors | Postsynaptic Density |
|---------------|---------------------|---------------------------------------|----------------------|---------------|-----------------------------------------------|----------------|--------------------|----------------------|
| <i>arc</i>    | <i>inhba</i>        | <i>adcyl1</i>                         | <i>gnai1</i>         | <i>adam10</i> | <i>adam10</i>                                 | <i>akt1</i>    | <i>ephb2</i>       | <i>adam10</i>        |
| <i>bdnf</i>   | <i>synpo</i>        | <i>adcyl8</i>                         | <i>gria1</i>         | <i>cdh2</i>   | <i>mmp9</i>                                   | <i>camk2g</i>  | <i>gabra5</i>      | <i>arc</i>           |
| <i>cebpb</i>  |                     | <i>bdnf</i>                           | <i>gria2</i>         | <i>grin2a</i> | <i>plat</i>                                   | <i>grin1</i>   | <i>gria1</i>       | <i>dlg4</i>          |
| <i>cebpd</i>  |                     | <i>camk2a</i>                         | <i>gria3</i>         | <i>grin2b</i> | <i>tpa</i>                                    | <i>grin2a</i>  | <i>gria2</i>       | <i>gria1</i>         |
| <i>creb1</i>  |                     | <i>camk2g</i>                         | <i>gria4</i>         | <i>ncam1</i>  | <i>reln</i>                                   | <i>grin2b</i>  | <i>gria3</i>       | <i>gria3</i>         |
| <i>crem</i>   |                     | <i>cdh2</i><br>( <i>n-cadherin</i> )  | <i>grip1</i>         | <i>pcdh8</i>  | <i>timp1</i>                                  | <i>grin2c</i>  | <i>gria4</i>       | <i>gria4</i>         |
| <i>egr1</i>   |                     | <i>cnr1</i>                           | <i>grm1</i>          | <i>ppp2ca</i> |                                               | <i>grin2d</i>  | <i>grin1</i>       | <i>grin1</i>         |
| <i>egr2</i>   |                     | <i>gabra5</i>                         | <i>grm2</i>          | <i>reln</i>   |                                               | <i>mapk1</i>   | <i>grin2a</i>      | <i>grin2a</i>        |
| <i>egr3</i>   |                     | <i>gnai1</i>                          | <i>igf1</i>          | <i>tnf</i>    |                                               | <i>ppp1ca</i>  | <i>grin2b</i>      | <i>grin2b</i>        |
| <i>egr4</i>   |                     | <i>gria1</i>                          | <i>mapk1</i>         | <i>cdh2</i>   |                                               | <i>ppp1cc</i>  | <i>grin2c</i>      | <i>grin2c</i>        |
| <i>fos</i>    |                     | <i>gria2</i>                          | <i>nos1</i>          |               |                                               | <i>erk2</i>    | <i>grin2d</i>      | <i>grm1</i>          |
| <i>homer1</i> |                     | <i>grin1</i>                          | <i>ngfr</i>          |               |                                               |                | <i>grm1</i>        | <i>grm3</i>          |
| <i>jun</i>    |                     | <i>grin2a</i>                         | <i>pick1</i>         |               |                                               |                | <i>grm2</i>        | <i>homer1</i>        |
| <i>junb</i>   |                     | <i>grin2b</i>                         | <i>plat (tpa)</i>    |               |                                               |                | <i>grm3</i>        | <i>pick1</i>         |
| <i>klf10</i>  |                     | <i>grin2c</i>                         | <i>ppp1ca</i>        |               |                                               |                | <i>grm4</i>        | <i>synpo</i>         |
| <i>mmp9</i>   |                     | <i>grin2d</i>                         | <i>ppp1cc</i>        |               |                                               |                | <i>grm5</i>        | <i>psd95</i>         |
| <i>nfkb1</i>  |                     | <i>mapk1</i>                          | <i>ppp1r14a</i>      |               |                                               |                | <i>grm7</i>        |                      |
| <i>nfkbib</i> |                     | <i>mmp9</i><br>( <i>gelatinaseb</i> ) | <i>ppp2ca</i>        |               |                                               |                | <i>grm8</i>        |                      |
| <i>ngf</i>    |                     | <i>ntf4</i>                           | <i>ppp3ca</i>        |               |                                               |                | <i>ntrk2</i>       |                      |
| <i>nptx2</i>  |                     | <i>ntrk2</i>                          | <i>prkca</i>         |               |                                               |                |                    |                      |
| <i>nr4a1</i>  |                     | <i>plcg1</i>                          | <i>prkg1</i>         |               |                                               |                |                    |                      |
| <i>ntf3</i>   |                     | <i>ppp1ca</i>                         | <i>cpi-17</i>        |               |                                               |                |                    |                      |
| <i>pcdh8</i>  |                     | <i>ppp1cc</i>                         |                      |               |                                               |                |                    |                      |
| <i>pim1</i>   |                     | <i>ppp3ca</i>                         |                      |               |                                               |                |                    |                      |
| <i>plat</i>   |                     | <i>prkca</i>                          |                      |               |                                               |                |                    |                      |
| <i>rela</i>   |                     | <i>prkcg</i>                          |                      |               |                                               |                |                    |                      |
| <i>rgs2</i>   |                     | <i>rab3a</i>                          |                      |               |                                               |                |                    |                      |
| <i>rheb</i>   |                     | <i>ywhaq</i>                          |                      |               |                                               |                |                    |                      |
| <i>srf</i>    |                     |                                       |                      |               |                                               |                |                    |                      |
| <i>tnf</i>    |                     |                                       |                      |               |                                               |                |                    |                      |
| <i>trip9</i>  |                     |                                       |                      |               |                                               |                |                    |                      |

**Table S6:** Go enrichment for modules of interest.

| MODULE               | Module size | Preference DE genes* | Non-preference DE genes* | Social - mating* | SPG/IEG* | Relevant GO enriched terms<br>(statistically significant enrichment with p<0.1)                                                                                                                                                                                                                       |
|----------------------|-------------|----------------------|--------------------------|------------------|----------|-------------------------------------------------------------------------------------------------------------------------------------------------------------------------------------------------------------------------------------------------------------------------------------------------------|
| <b>OPTIC TECTUM</b>  |             |                      |                          |                  |          |                                                                                                                                                                                                                                                                                                       |
| OT5                  | 863         |                      |                          |                  | ■        | transmembrane signaling receptor activity - potassium channel activity -voltage-gated channel activity - receptor tyrosine kinase binding - signaling receptor activity                                                                                                                               |
| OT9                  | 273         | ■                    |                          |                  |          | Multiple DNA binding terms - translation initiation factor binding - thyrotropin-releasing hormone receptor binding - cotranslational protein targeting to membrane - aromatic compound catabolic process                                                                                             |
| OT12                 | 247         | ■                    |                          |                  |          | AMPA glutamate receptor activity - protein homodimerization activity - androgen receptor activity - protein homodimerization activity - regulation of neuron projection development                                                                                                                   |
| OT15                 | 13          | ■                    |                          |                  |          | sterol transporter activity - sterol desaturase activity -negative regulation of protein tyrosine kinase activity - NFAT protein import into nucleus                                                                                                                                                  |
| OT16                 | 258         |                      | ■                        |                  |          | hydrolase activity - prostaglandin-E synthase activity - prostaglandin-E synthase activity - Rho GTPase binding - forebrain astrocyte differentiation - peptide transport - response to stimulus - myosin binding                                                                                     |
| OT17                 | 659         |                      |                          | ■                |          | G-protein coupled receptor activity - ionotropic glutamate receptor binding - protein tyrosine kinase binding - calcium channel regulator activity - glutamate binding - G-protein coupled glutamate receptor activity                                                                                |
| OT21                 | 45          | ■                    |                          |                  |          | Sodium/neurotransmitter: amino acid symporter activity - Rho GDP-dissociation inhibitor binding - neurotransmitter transporter activity - Various G-protein coupled related terms - myosin V binding - pheromone-dependent signal transduction - steroid sulfotransferase activity - hormone activity |
| OT24                 | 388         | ■                    |                          |                  |          | glutamate receptor activity - ligand-gated calcium channel activity - voltage-gated calcium channel activity - lipoprotein transporter activity                                                                                                                                                       |
| OT31                 | 78          |                      | ■                        |                  |          | canonical Wnt signaling pathway - pheromone-dependent signal transduction - neurotransmitter: sodium symporter activity- Rho GDP-dissociation inhibitor binding                                                                                                                                       |
| OT32                 | 66          |                      | ■                        |                  |          | Wnt-activated receptor activity - L-tyrosine transmembrane transporter activity - aromatase activity - regulation of Notch signaling pathway - auditory receptor cell fate commitment                                                                                                                 |
| OT40                 | 711         |                      |                          |                  |          | translation initiation factor activity - transcription factor binding - purine-nucleoside phosphorylase activity                                                                                                                                                                                      |
| <b>TELENCEPHALON</b> |             |                      |                          |                  |          |                                                                                                                                                                                                                                                                                                       |
| T2                   | 7           |                      |                          |                  | ■        | transcription factor activity - positive regulation of mating-type specific transcription from RNA polymerase II promoter - positive regulation of cellular amine catabolic process -                                                                                                                 |
| T4                   | 113         | ■                    |                          |                  |          | sodium-dependent organic cation transport - cystine:glutamate antiporter activity - neurotransmitter transporter activity - prostaglandin F receptor activity - cation:cation antiporter activity                                                                                                     |
| T12                  | 18          |                      |                          | ■                | ■        | protein tyrosine phosphatase activity - transcription factor activity - neuregulin receptor activity - voltage-gated calcium channel activity - ERK1 and ERK2 cascade - negative regulation of kinase activity                                                                                        |
| T13                  | 1642        |                      |                          |                  | ■        | Neurogenesis - signal transduction - synaptic signaling - modulation of synaptic transmission - modulation of signaling - response to stimulus                                                                                                                                                        |
| T23                  | 10          |                      | ■                        |                  |          | methionine-tRNA ligase activity - neuregulin receptor activity - purine nucleotide binding - inter-male aggressive behavior - response to follicle-stimulating hormone - response to gonadotropin - regulation of synapse maturation                                                                  |
| T29                  | 13          |                      | ■                        |                  |          | sodium:potassium:chloride symporter activity - kinase binding - hormone receptor binding - Ras guanyl-nucleotide exchange factor activity - synaptic vesicle coating - motor learning                                                                                                                 |

|     |     |   |   |   |   |                                                                                                                                                                                                                                                                                                  |
|-----|-----|---|---|---|---|--------------------------------------------------------------------------------------------------------------------------------------------------------------------------------------------------------------------------------------------------------------------------------------------------|
| T31 | 2   |   | ■ |   |   | signal transducer activity - transmembrane receptor protein tyrosine kinase activity - transferase activity - gonadotropin-releasing hormone (GnRH) - neuronal migration to the hypothalamus - neuropilin signaling pathway                                                                      |
| T32 | 28  |   |   |   | ■ | modulation of synaptic transmission - motor behavior - regulation of neurotransmitter transport - glutamate receptor signaling pathway - synaptic transmission, glutamatergic - glutamate receptor activity - receptor activity - AMPA glutamate receptor activity - signaling receptor activity |
| T37 | 982 | ■ |   |   |   | hydrolase activity - sterol O-acyltransferase activity - amide transmembrane transporter activity - structural constituent of ribosome - protein channel activity - peptide transmembrane transporter activity                                                                                   |
| 43  | 72  |   |   | ■ | ■ | learning or memory - behavior - cognition - signal transduction - translation repressor activity - neurotrophin receptor activity - purine nucleoside binding - sterol-transporting ATPase activity - glutamate binding - synapse organization - signal release from synapse                     |
| 46  | 29  | ■ |   |   |   | pyruvate dehydrogenase activity - ribosome binding - laminin receptor activity - nuclear-transcribed mRNA catabolic process                                                                                                                                                                      |

\*Enrichment of modules in each GO category was determined using a p-value threshold of 0.1. Color squares indicate the gene enrichment for each module: modules enriched in Preference DE genes have a red square, non-preference DE genes a dark grey square, known preference/social behavior genes a green square and synaptic plasticity genes & immediate early genes a black square. Module size corresponds to number of genes within a module after filtering out genes without genes correlations >0.4.

**Table S7:** Pathways for Preference DE genes.

| OPTIC TECTUM                                           |            |            |             |             |             |             |             | TELENCEPHALON |                                     |            |            |
|--------------------------------------------------------|------------|------------|-------------|-------------|-------------|-------------|-------------|---------------|-------------------------------------|------------|------------|
| Preference DE Genes<br>Pathways                        | Module OT5 | Module OT9 | Module OT12 | Module OT15 | Module OT17 | Module OT21 | Module OT24 | Module OT40   | Preference DE Genes<br>Pathways     | Module T13 | Module T37 |
|                                                        |            |            |             |             |             |             |             |               |                                     |            |            |
| <i>Rap1 signaling</i>                                  | ■          |            |             |             |             |             |             |               | <i>Toll-Like Receptors Cascades</i> | ■          |            |
| <i>Cocaine addiction</i>                               | ■          |            |             |             |             |             |             |               | <i>Parkinson's disease</i>          |            | ■          |
| <i>Phototransduction</i>                               | ■          |            |             |             |             |             |             |               | <i>Huntington's disease</i>         |            | ■          |
| <i>Sodium/Calcium exchangers</i>                       | ■          |            |             |             |             |             |             |               | <i>Alzheimer's disease</i>          |            | ■          |
| <i>Ribosome</i>                                        |            | ■          |             |             |             |             |             |               | <i>Oxytocin signaling pathway</i>   |            | ■          |
| <i>Notch signaling pathway</i>                         |            | ■          |             |             |             |             |             |               | <i>AMPK signaling pathway</i>       |            | ■          |
| <i>Signaling by Wnt</i>                                |            | ■          |             |             |             |             | ■           |               | <i>Ribosome</i>                     |            | ■          |
| <i>MAPK family signaling cascades</i>                  |            | ■          |             |             |             |             |             |               | <i>Translation</i>                  |            | ■          |
| <i>NOD-like receptor signaling pathway</i>             |            |            | ■           |             |             |             |             |               |                                     |            |            |
| <i>Membrane Trafficking</i>                            |            |            |             | ■           |             |             |             |               |                                     |            |            |
| <i>Vesicle-mediated transport</i>                      |            |            |             | ■           |             |             |             |               |                                     |            |            |
| <i>Purine metabolism</i>                               |            |            |             |             | ■           |             |             |               |                                     |            |            |
| <i>Oxytocin signaling pathway</i>                      |            |            |             |             |             | ■           |             |               |                                     |            |            |
| <i>cGMP-PKG signaling pathway</i>                      |            |            |             |             |             | ■           |             |               |                                     |            |            |
| <i>Signal Transduction</i>                             |            | ■          |             |             |             | ■           |             |               |                                     |            |            |
| <i>Gastrin-CREB signaling pathway via PKC and MAPK</i> |            |            |             |             |             | ■           |             |               |                                     |            |            |
| <i>Protein folding</i>                                 |            |            |             |             |             |             | ■           |               |                                     |            |            |
| <i>Glutamatergic synapse</i>                           |            |            |             |             |             |             |             | ■             |                                     |            |            |
| <i>Dopaminergic synapse</i>                            |            |            |             |             |             |             |             |               |                                     |            | ■          |
| <i>cAMP signaling pathway</i>                          |            |            |             |             |             |             |             |               |                                     |            | ■          |
| <i>Long-term depression</i>                            |            |            |             |             |             |             |             |               |                                     |            | ■          |
| <i>Taste transduction</i>                              |            |            |             |             |             |             |             |               |                                     |            | ■          |
| <i>Phase 0 - rapid depolarisation</i>                  |            |            |             |             |             |             |             |               |                                     |            | ■          |
| <i>TCF dependent signaling in response to WNT</i>      |            |            |             |             |             |             |             |               |                                     |            | ■          |
| <i>Neurotransmitter Release Cycle</i>                  |            |            |             |             |             |             |             |               |                                     |            | ■          |

**Table S8:** Pathways for Social DE genes.

| <p>OPTIC TECTUM<br/>Social DE genes<br/>Pathways</p>                                                                                                                                                                                                                                                                                                                                                                                                                                                                                                                                                                                                                                                                                                                                                                                                                                                                                                                                                                                                                                                                                                                                                                                                                                                                                                                    | <p>TELENCEPHALON<br/>Social DE genes<br/>Pathways</p>                                                                                                                                                                                                                                                                                                                                                                                                                                                                                                                                                                                                                                                                                                                                                                      |
|-------------------------------------------------------------------------------------------------------------------------------------------------------------------------------------------------------------------------------------------------------------------------------------------------------------------------------------------------------------------------------------------------------------------------------------------------------------------------------------------------------------------------------------------------------------------------------------------------------------------------------------------------------------------------------------------------------------------------------------------------------------------------------------------------------------------------------------------------------------------------------------------------------------------------------------------------------------------------------------------------------------------------------------------------------------------------------------------------------------------------------------------------------------------------------------------------------------------------------------------------------------------------------------------------------------------------------------------------------------------------|----------------------------------------------------------------------------------------------------------------------------------------------------------------------------------------------------------------------------------------------------------------------------------------------------------------------------------------------------------------------------------------------------------------------------------------------------------------------------------------------------------------------------------------------------------------------------------------------------------------------------------------------------------------------------------------------------------------------------------------------------------------------------------------------------------------------------|
| <p><i>Activation of NMDA receptor upon glutamate binding and postsynaptic events</i><br/><i>AGE-RAGE signaling pathway in diabetic complications</i><br/><i>Alzheimer's disease</i><br/><i>Calcium signaling pathway</i><br/><i>cAMP signaling pathway</i><br/><i>Cocaine addiction</i><br/><i>Dopaminergic synapse</i><br/><i>Glutamate Binding, Activation of AMPA Receptors and Synaptic Plasticity</i><br/><i>Glutamatergic synapse</i><br/><i>GnRH signaling pathway</i><br/><i>Huntington's disease</i><br/><i>JNK (c-Jun kinases) phosphorylation and activation mediated by activated human TAK1</i><br/><i>Long-term depression</i><br/><i>Long-term potentiation</i><br/><i>MAPK targets/ Nuclear events mediated by MAP kinases</i><br/><i>NADPH regeneration</i><br/><i>Neuroactive ligand-receptor interaction</i><br/><i>Neurotrophin signaling pathway</i><br/><i>NOD-like receptor signaling pathway</i><br/><i>Progesterone-mediated oocyte maturation</i><br/><i>Rap1 signaling pathway</i><br/><i>Retrograde endocannabinoid signaling</i><br/><i>Serotonergic synapse</i><br/><i>Signal attenuation</i><br/><i>Signal Transduction</i><br/><i>Signal transduction by L1</i><br/><i>Signaling by Rho GTPases</i><br/><i>Stimuli-sensing channels</i><br/><i>Regulation of actomyosin structure organization</i><br/><i>Wnt signaling pathway</i></p> | <p><i>Activated TLR4 signaling</i><br/><i>MHC class II antigen presentation</i><br/><i>SRP-dependent cotranslational protein targeting to membrane</i><br/><i>Toll-Like Receptors Cascades</i><br/><i>Diseases of signal transduction</i><br/><i>Signaling by Activin</i><br/><i>Translation</i><br/><i>Gene Expression</i><br/><i>Signal Transduction</i><br/><i>Transmembrane transport of small molecules</i><br/><i>Activation of HOX genes during differentiation</i><br/><i>Apoptotic factor-mediated response</i><br/><i>Glycoprotein hormones</i><br/><i>Ligand-independent caspase activation via DCC</i><br/><i>NOTCH2 intracellular domain regulates transcription</i><br/><i>Stimuli-sensing channels</i><br/><i>Transcriptional Regulation by TP53</i><br/><i>Transmission across Electrical Synapses</i></p> |

**Table S9:** Social DE genes transcription factor motifs represented among Preference DE genes.

| OPTIC TECTUM             |                                                                                                                                                          |                                                                                                                                                                               |                                                               |                |
|--------------------------|----------------------------------------------------------------------------------------------------------------------------------------------------------|-------------------------------------------------------------------------------------------------------------------------------------------------------------------------------|---------------------------------------------------------------|----------------|
| Social DE genes TF motif | Biological role in behavior                                                                                                                              | Preference DE genes with predicted TF binding site                                                                                                                            | Pattern in attractive relative to dull treatment <sup>δ</sup> |                |
|                          |                                                                                                                                                          |                                                                                                                                                                               | Preference                                                    | Non preference |
| <i>otx1</i>              | Neuronal differentiation associate with social challenges <sup>8,9</sup> - autism <sup>10</sup>                                                          | <i>pdzrn3, thap1, txnrd2, rgl2</i>                                                                                                                                            | DOWN                                                          | UP             |
| <i>zic4</i>              | -                                                                                                                                                        | <i>tubb4a, pdzrn3, mrps2, thap1, rnf165, npr2, tbc1d10b, tmem198, far1, rgl2</i>                                                                                              | DOWN                                                          | DOWN           |
| <i>pou3f4</i>            | Social challenges <sup>8</sup> autism-like behavior <sup>11</sup>                                                                                        | <i>gca, gri3, scn2a, nlrp3, zic4, scn8a, far1</i>                                                                                                                             | DOWN                                                          | DOWN           |
| <i>zic1</i>              | Involved in neurogenesis and behavioral abnormalities in mice <sup>12</sup>                                                                              | <i>tac1, tubb4a, cand1, gca, pdzrn3, mrps2, gri3, rnf165, mrpl9, tpm3, npr2, ablim2, tbc1d10b, zic4, psmd2, txnrd2, tmem198, scn8a, far1, rgl2</i>                            | DOWN                                                          | DOWN           |
| <i>pbx1</i>              | neuroendocrine stress signaling - social or fear inducing behavior <sup>13</sup>                                                                         | <i>gca, nlrp3, ablim2, zic4, txnrd2, far1, tac1, scn2a, mrpl9, scn8a</i>                                                                                                      | DOWN                                                          | UP             |
| <i>htf4</i>              |                                                                                                                                                          | <i>tac1, tubb4a, dtx4, cand1, gca, mrps2, gri3, mrpl9, tpm3, npr2, nlrp3, ablim2, ddb1, tbc1d10b, psmd2, txnrd2, tmem198, scn8a</i>                                           | DOWN                                                          | UP             |
| <i>satb1</i>             | Alters temporal expression of multiple IEG and SPG controlling the genomic response at the basis of complex behaviors, learning and memory <sup>14</sup> | <i>tubb4a, dtx4, cand1, gca, pdzrn3, mrps2, gri3, thap1, scn2a, rnf165, mrpl9, tpm3, npr2, nlrp3, ablim2, ddb1, tbc1d10b, zic4, psmd2, txnrd2, tmem198, scn8a, far1, rgl2</i> | UP                                                            | DOWN           |
| <i>sall1</i>             | Townes-Brocks syndrome <sup>15</sup>                                                                                                                     | <i>dtx4, tubb4a, cand1, gca, pdzrn3, mrps2, tpm3, npr2, ablim2, tbc1d10b, tmem198, rgl2</i>                                                                                   | DOWN                                                          | DOWN           |
| <i>znf718</i>            | -                                                                                                                                                        | <i>gca, mrpl9</i>                                                                                                                                                             | UP                                                            | DOWN           |
| <i>foxk2</i>             | Cognitive deficits with age and Parkinson's disease <sup>16,17</sup>                                                                                     | <i>tac1, cand1, pdzrn3, mrps2, scn2a, rnf165, mrpl9, nlrp3, ddb1, far1</i>                                                                                                    | DOWN                                                          | UP             |
| <i>klf5</i>              | Family of co-regulators and integrators of steroid hormone actions - Social challenges <sup>8</sup>                                                      | <i>tubb4a, dtx4, cand1, pdzrn3, mrps2, gri3, thap1, rnf165, mrpl9, tpm3, npr2, ablim2, ddb1, zic4, txnrd2, tmem198, scn8a, far1, rgl2</i>                                     | DOWN                                                          | UP             |
| <i>ap2</i>               | Gene expression regulation in synaptic plasticity associated with social challenges (                                                                    | <i>tubb4a, dtx4, pdzrn3, mrps2, thap1, scn2a, rnf165, mrpl9, npr2, ablim2, ddb1, tbc1d10b, psmd2, txnrd2, tmem198, scn8a, far1</i>                                            | DOWN                                                          | DOWN           |
| <i>gata2</i>             | Social challenges <sup>8</sup> , social eavesdropping <sup>18</sup>                                                                                      | <i>tac1, tubb4a, dtx4, cand1, gca, gri3, thap1, scn2a, rnf165, mrpl9, nlrp3, ddb1, tmem198, scn8a, npr2, pdzrn3, ablim2, txnrd2, tpm3, psmd2</i>                              | UP                                                            | -              |
| TELENCEPHALON            |                                                                                                                                                          |                                                                                                                                                                               |                                                               |                |
| <i>neurod2</i>           | Regulation of neurogenesis, social behavior (                                                                                                            | <i>rpl18, c2cd5, ndufb9, dhx36, rps17, rps2, ndufb9, rpl35a, eef2</i>                                                                                                         | UP                                                            | DOWN           |
| <i>egr2</i>              | Neuronal plasticity -reproduction or social behavior - Social challenges <sup>8</sup> , autism <sup>19</sup> memory and learning <sup>20</sup>           | <i>rpl4, rpl18, fcrla, rps2, c2cd5, ndufb9, eef2, rps17, dhx36</i>                                                                                                            | UP                                                            | UP             |
| <i>Klf7</i>              | Family of co-regulators and integrators of steroid hormone actions, autism and learning disorders <sup>21</sup> , learning <sup>22</sup>                 | <i>rps2, ndufb9, eef2, rpl18, c2cd5, rpl4, rps17, rpl35a</i>                                                                                                                  | DOWN                                                          | UP             |
| <i>satb1</i>             | Alters temporal expression of multiple IEG and SPG controlling the genomic response at the basis of complex behaviors, learning and memory <sup>14</sup> | <i>rpl18, c2cd5, rps2, eef2, rpl4, dhx36, rpl35a, rps17, fcrla, ndufb9</i>                                                                                                    | UP                                                            | UP             |

<sup>δ</sup>Whether transcription factors are down-regulated or up-regulated in females exposed to an attractive vs dull male. Details on expression patterns for each transcription factor can be found in Fig. S7

**Table S10:** Assembly statistics.

|                                    | De novo assembly | Genome-guided assembly | Reference Transcriptome |
|------------------------------------|------------------|------------------------|-------------------------|
| Number of transcripts:             | 704766           | 49012                  |                         |
| before filtering                   |                  |                        |                         |
| after ncRNA filter                 | 703564           | 48901                  | 61092                   |
| After best isoform selection       | 490912           | 26138                  |                         |
| After ORF filtering                | 44769            | -                      |                         |
| Average length                     | 895              | 2730                   | 1450                    |
| Maximum length                     | 18612            | 93950                  | 93950                   |
| Minimum length                     | 297              | 67                     | 155                     |
| N50                                | 1380             | 3599                   | 3046                    |
| N90                                | 351              | 1477                   | 411                     |
| Merging statistics                 |                  |                        |                         |
| De novo assembly transcripts       | -                | -                      | 25792                   |
| Average length                     | -                | -                      | 2756                    |
| Genome-guided assembly transcripts | -                | -                      | 35300                   |
| Average length                     | -                | -                      | 496                     |
| BLAST & Annotation statistics      |                  |                        |                         |
| Transcripts with >1 Blast hit      |                  |                        | 17517                   |
| Transcripts with no Blast hits     |                  |                        | 3681                    |
| GO annotations                     |                  |                        | 17142                   |

**Table S11:** Samples.

| LINE                 | TREATMENT       | Sample number |               |
|----------------------|-----------------|---------------|---------------|
|                      |                 | Optic Tectum  | Telencephalon |
| PREFERENCE LINES     | Attractive male | 25* (5)       | 30 (6)        |
|                      | Dull Male       | 30 (6)        | 30 (6)        |
|                      | Female          | 25* (5)       | 30 (6)        |
| NON-PREFERENCE LINES | Attractive male | 15 (3)        | 15 (3)        |
|                      | Dull Male       | 15 (3)        | 15 (3)        |
|                      | Female          | 15 (3)        | 10* (2)       |

Samples were arranged in non-overlapping pools of 5 individuals for RNA-Seq. Number of female brains, and corresponding pools in parenthesis, used for each treatment in Preference and Non-preference lines. (\*) One pool excluded from this treatment as a statistical outlier.



## CAPTIONS FOR DATABASES

### **Additional Data table S1 (separate file)**

Optic tectum normalized count data for differentially expressed genes

### **Additional Data table S2 (separate file)**

Databases S2: Telencephalon normalized count data for differentially expressed genes

## SUPPLEMENTARY REFERENCES

1. Suzuki, R. & Shimodaira, H. Pvcust: an R package for assessing the uncertainty in hierarchical clustering. *Bioinformatics* 22, 1540-1542 (2006).
2. Reimand, J. et al. g:Profiler-a web server for functional interpretation of gene lists (2016 update). *Nucleic Acids Res* 44, W83-9 (2016).
3. Atluri, V. S. R., Kanthikeel, S. P., Reddy, P. V. B., Yndart, A. & Nair, M. P. N. Human Synaptic Plasticity Gene Expression Profile and Dendritic Spine Density Changes in HIV-Infected Human CNS Cells: Role in HIV-Associated Neurocognitive Disorders (HAND). *PLoS ONE* 8, e61399 (2013).
4. Cummings, M. E. The mate choice mind: studying mate preference, aversion and social cognition in the female poeciliid brain. *Anim Behav* 103, 249-258 (2015).
5. Ramsey, M. E., Maginnis, T. L., Wong, R. Y., Brock, C. & Cummings, M. E. Identifying Context-Specific Gene Profiles of Social, Reproductive, and Mate Preference Behavior in a Fish Species with Female Mate Choice. *Frontiers in Neuroscience* 6, 62 (2012).
6. Cummings, M. E. Looking for sexual selection in the female brain. *Phil. Trans. R. Soc. Lond. B* 367, 2348-2356 (2012).
7. Wong, R. Y. & Cummings, M. E. Expression patterns of neuroligin-3 and tyrosine hydroxylase across the brain in mate choice contexts in female swordtails. *Brain Behav Evolut* 83, 231-243 (2014).
8. Rittschof, C. C. et al. Neuromolecular responses to social challenge: Common mechanisms across mouse, stickleback fish, and honey bee. *P Natl Acad Sci Usa* 111, 17929-17934 (2014).
9. Larsen, K. B., Lutterodt, M. C., Møllgård, K. & Møller, M. Expression of the Homeobox Genes OTX2 and OTX1 in the Early Developing Human Brain. *Journal of Histochemistry & Cytochemistry* 58, 669-678 (2010).
10. Seong, E., Seasholtz, A. F. & Burmeister, M. Mouse models for psychiatric disorders. *Trends in Genetics* 18, 643-650 (2002).
11. Hamilton, S. M. et al. Multiple autism-like behaviors in a novel transgenic mouse model. *Behav Brain Res* 218, 29-41 (2011).
12. Ogura, H., Aruga, J. & Mikoshiba, K. Behavioral Abnormalities of Zic1 and Zic2 Mutant Mice: Implications as Models for Human Neurological Disorders. *Behav Genet* 31, 317-324 (2001).
13. Gerlai, R. et al. Forward Genetic Screening Using Behavioral Tests in Zebrafish: A Proof of Concept Analysis of Mutants. *Behav Genet* 47, 125-139 (2017).
14. Balamotis, M. A. et al. Satb1 ablation alters temporal expression of immediate early genes and reduces dendritic spine density during postnatal brain development. *Mol. Cell. Biol.* 32, 333-347 (2012).
15. Harrison, S. J., Nishinakamura, R., Jones, K. R. & Monaghan, A. P. Sall1 regulates cortical neurogenesis and laminar fate specification in mice: implications for neural abnormalities in Townes-Brocks syndrome. *Disease Models & Mechanisms* 5, 351-365 (2012).

16. Buechel, H. M. et al. Deep Sleep and Parietal Cortex Gene Expression Changes Are Related to Cognitive Deficits with Age. *PLoS ONE* 6, e18387 (2011).
17. Chung, S. J. et al. Genomic determinants of motor and cognitive outcomes in Parkinson's disease. *Parkinsonism & Related Disorders* 18, 881-886 (2012).
18. Lopes, J. S., Abril-de-Abreu, R. & Oliveira, R. F. Brain Transcriptomic Response to Social Eavesdropping in Zebrafish (*Danio rerio*). *PLoS ONE* 10, e0145801 (2015).
19. Swanberg, S. E., Nagarajan, R. P., Peddada, S., Yasui, D. H. & LaSalle, J. M. Reciprocal co-regulation of EGR2 and MECP2 is disrupted in Rett syndrome and autism. *Human Molecular Genetics* 18, 525-534 (2009).
20. Poirier, R. et al. Paradoxical Role of an Egr Transcription Factor Family Member, Egr2/Krox20, in Learning and Memory. *Front. Behav. Neurosci.* 1, 6 (2007).
21. Roberts, J. L., Hovanes, K., Dasouki, M., Manzardo, A. M. & Butler, M. G. Chromosomal microarray analysis of consecutive individuals with autism spectrum disorders or learning disability presenting for genetic services. *Gene* 535, 70-78 (2014).
22. Laub, F. et al. Transcription factor KLF7 is important for neuronal morphogenesis in selected regions of the nervous system. *Mol. Cell. Biol.* 25, 5699-5711 (2005).
